# Supplementary material for: Dehydro-oxazole, thiazole and imidazole radicals: insights into the electronic structure, stability and reactivity aspects
Source: Royal Society of Chemistry journal article supplement (doi:10.1039/c6cp05677f), 2016-12-01
Supplement: c6cp05677f1.pdf [file c6cp05677f1.pdf]

## Supporting information

### **Dehydro-oxazole, thiazole and imidazole radicals: Insights into the electronic structure, stability and reactivity aspects**

Anamika Mukhopadhyay,<sup>a</sup> Lilit Jacob<sup>a</sup> and Sugumar Venkataramani<sup>\*a</sup>

Department of Chemical Sciences,  
Indian Institute of Science Education and Research (IISER) Mohali,  
Sector 81, Manali PO, S. A. S. Nagar, India

Email: [sugumarv@iisermohali.ac.in](mailto:sugumarv@iisermohali.ac.in)

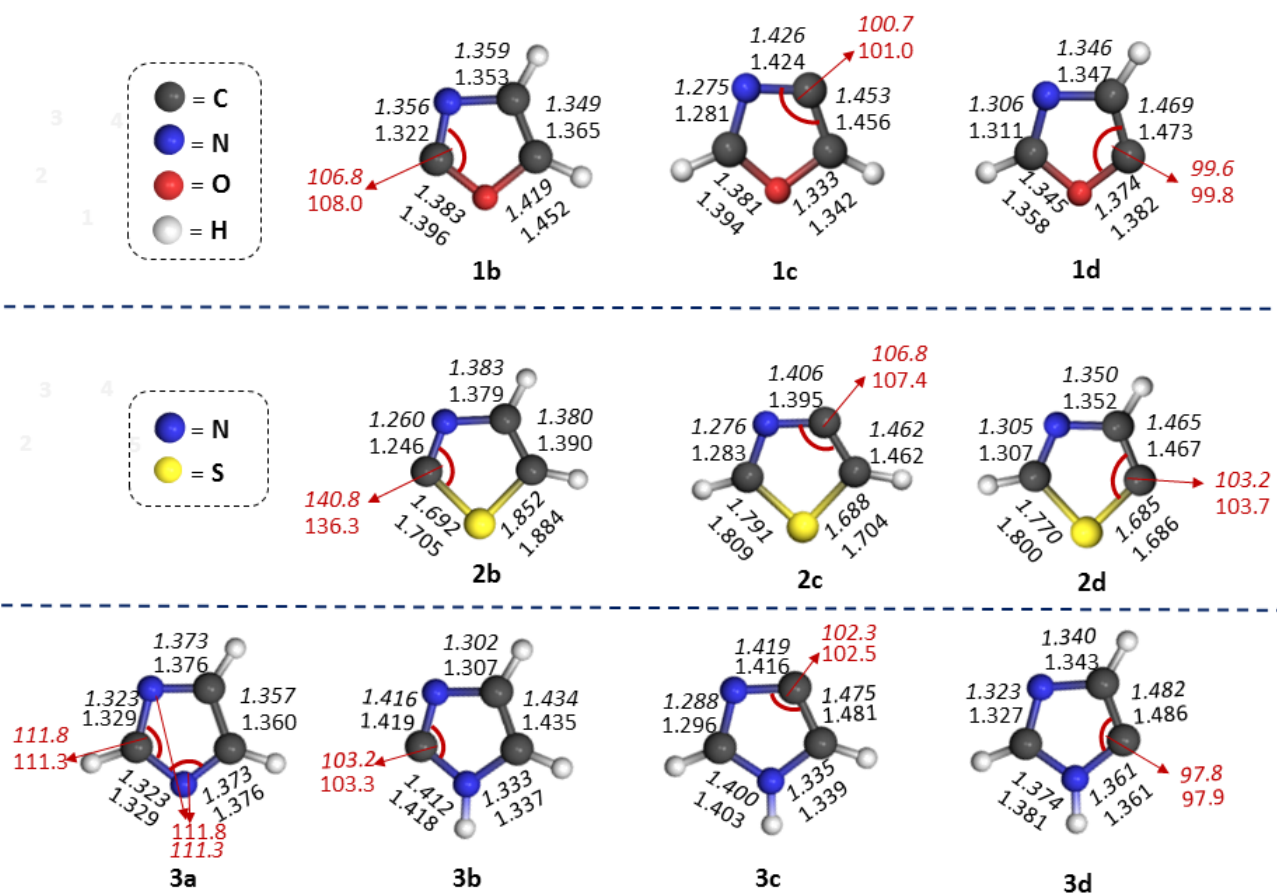

**Fig 1S:** The important geometrical parameters of  ${}^2A''$  symmetric structure of all the carbon radicals and  ${}^2A'$  symmetry in case of **3a**. The normal font indicate (U)B3LYP/cc-pVTZ and italics indicate (U)M06-2X/cc-pVTZ level of theory

**Table 1S:** The energy difference between  ${}^2A'$  and  ${}^2A''$  structures of all the radical isomers at (U)B3LYP/cc-pVTZ, (U)M06-2X/cc-pVTZ and (U)CCSD(T)/cc-pVTZ levels of theory.

| Species                     | Radical isomer            | Level of theory          | ${}^2A'$          |                                 | ${}^2A''$         |                               | $\Delta E ({}^2A''-{}^2A')$<br>kcal/mol |  |
|-----------------------------|---------------------------|--------------------------|-------------------|---------------------------------|-------------------|-------------------------------|-----------------------------------------|--|
|                             |                           |                          | Energy (Hartrees) | Number of Imaginary frequencies | Energy (Hartrees) | Number of imaginary frequency |                                         |  |
| <b>C-centred Radicals</b>   |                           |                          |                   |                                 |                   |                               |                                         |  |
| oxazole                     | <b>1b</b>                 | UB3LYP/cc-pVTZ           | -245.41625        | 0                               | -245.21205        | 1                             | 128.1                                   |  |
|                             |                           | (U)M06-2X/cc-pVTZ        | -245.32472        | 0                               | -245.12038        | 1                             | 128.2                                   |  |
|                             |                           | CCSD(T)/cc-pVTZ*         | -244.93070        | NA                              | -244.90336        | NA                            | 17.1                                    |  |
|                             | <b>1c</b>                 | UB3LYP/cc-pVTZ           | -245.41706        | 0                               | -245.36482        | 0                             | 32.8                                    |  |
|                             |                           | (U)M06-2X/cc-pVTZ        | -245.32487        | 0                               | -245.31543        | 0                             | 5.9                                     |  |
|                             |                           | CCSD(T)/cc-pVTZ*         | -244.93033        | NA                              | -244.90766        | NA                            | 14.2                                    |  |
|                             | <b>1d</b>                 | UB3LYP/cc-pVTZ           | -245.41247        | 0                               | -245.38870        | 0                             | 14.9                                    |  |
|                             |                           | (U)M06-2X/cc-pVTZ        | -245.32099        | 0                               | -245.29355        | 0                             | 17.2                                    |  |
|                             |                           | CCSD(T)/cc-pVTZ*         | -244.92704        | NA                              | -244.90404        | NA                            | 14.4                                    |  |
| Thiazole                    | <b>2b</b>                 | UB3LYP/cc-pVTZ           | -568.41653        | 0                               | -568.30790        | 1                             | 68.2                                    |  |
|                             |                           | (U)M06-2X/cc-pVTZ        | -568.31488        | 0                               | -568.16645        | 1                             | 93.1                                    |  |
|                             |                           | CCSD(T)/cc-pVTZ*         | -567.56006        | NA                              | -567.52575        | NA                            | 21.5                                    |  |
|                             | <b>2c</b>                 | UB3LYP/cc-pVTZ           | -568.41194        | 0                               | -568.35104        | 0                             | 38.2                                    |  |
|                             |                           | (U)M06-2X/cc-pVTZ        | -568.31118        | 0                               | -568.24539        | 0                             | 41.3                                    |  |
|                             |                           | CCSD(T)/cc-pVTZ*         | -567.55458        | NA                              | -567.53009        | NA                            | 15.4                                    |  |
|                             | <b>2d</b>                 | UB3LYP/cc-pVTZ           | -568.40387        | 0                               | -568.37537        | 0                             | 17.9                                    |  |
|                             |                           | (U)M06-2X/cc-pVTZ        | -568.30324        | 0                               | -568.27075        | 0                             | 20.4                                    |  |
|                             |                           | CCSD(T)/cc-pVTZ*         | -567.54870        | NA                              | -567.52022        | NA                            | 17.9                                    |  |
| imidazole                   | <b>3b</b>                 | UB3LYP/cc-pVTZ           | -225.54730        | 0                               | -225.51264        | 0                             | 21.7                                    |  |
|                             |                           | (U)M06-2X/cc-pVTZ        | -225.45671        | 0                               | -225.41685        | 0                             | 25.0                                    |  |
|                             |                           | CCSD(T)/cc-pVTZ*         | -225.09106        | NA                              | -225.05749        | NA                            | 21.1                                    |  |
|                             | <b>3c</b>                 | UB3LYP/cc-pVTZ           | -225.54642        | 0                               | -225.49234        | 0                             | 33.9                                    |  |
|                             |                           | (U)M06-2X/cc-pVTZ        | -225.45624        | 0                               | -225.39927        | 0                             | 35.7                                    |  |
|                             |                           | CCSD(T)/cc-pVTZ*         | -225.08999        | NA                              | -225.06538        | NA                            | 15.4                                    |  |
|                             | <b>3d</b>                 | UB3LYP/cc-pVTZ           | -225.54140        | 0                               | -225.52288        | 0                             | 11.6                                    |  |
|                             |                           | (U)M06-2X/cc-pVTZ        | -225.45079        | 0                               | -225.43280        | 0                             | 11.3                                    |  |
|                             |                           | CCSD(T)/cc-pVTZ*         | -225.08557        | NA                              | -225.07073        | NA                            | 9.3                                     |  |
|                             | <b>N-centred Radicals</b> |                          |                   |                                 |                   |                               |                                         |  |
|                             | <b>3a (C<sub>s</sub>)</b> | UB3LYP/cc-pVTZ           | -225.54992        | 1                               | -225.57941        | 0                             | -18.5                                   |  |
|                             |                           | (U)M06-2X/cc-pVTZ        | -225.44921        | 1                               | -225.48605        | 0                             | -23.1                                   |  |
| CCSD(T)/cc-pVTZ*            |                           | -225.08114               | NA                | -225.12539                      | NA                | -27.8                         |                                         |  |
| <b>3a(C<sub>2v</sub>)**</b> | UB3LYP/cc-pVTZ            | -225.39034 ( ${}^2A_g$ ) | 3                 | -225.57940 ( ${}^2B_1$ )        | 0                 | -118.6                        |                                         |  |
|                             | (U)M06-2X/cc-pVTZ         | -225.28281 ( ${}^2A_g$ ) | 3                 | -225.48605 ( ${}^2B_1$ )        | 0                 | -127.5                        |                                         |  |
|                             | CCSD(T)/cc-pVTZ*          | -225.09669 ( ${}^2A_g$ ) | NA                | -225.12390 ( ${}^2B_1$ )        | NA                | -18.0                         |                                         |  |

\*The single point energies have been calculated at (U)CCSD(T)/cc-pVTZ using (U)B3LYP/cc-pVTZ geometries.

\*\* The calculations for imidazole radical **3a** with C<sub>2v</sub> point group has been done seperately. A new configuration with  ${}^2A_2$  electronic structure has been optimized and the energy difference ( ${}^2A_2$ - ${}^2B_1$ ) also been calculated.

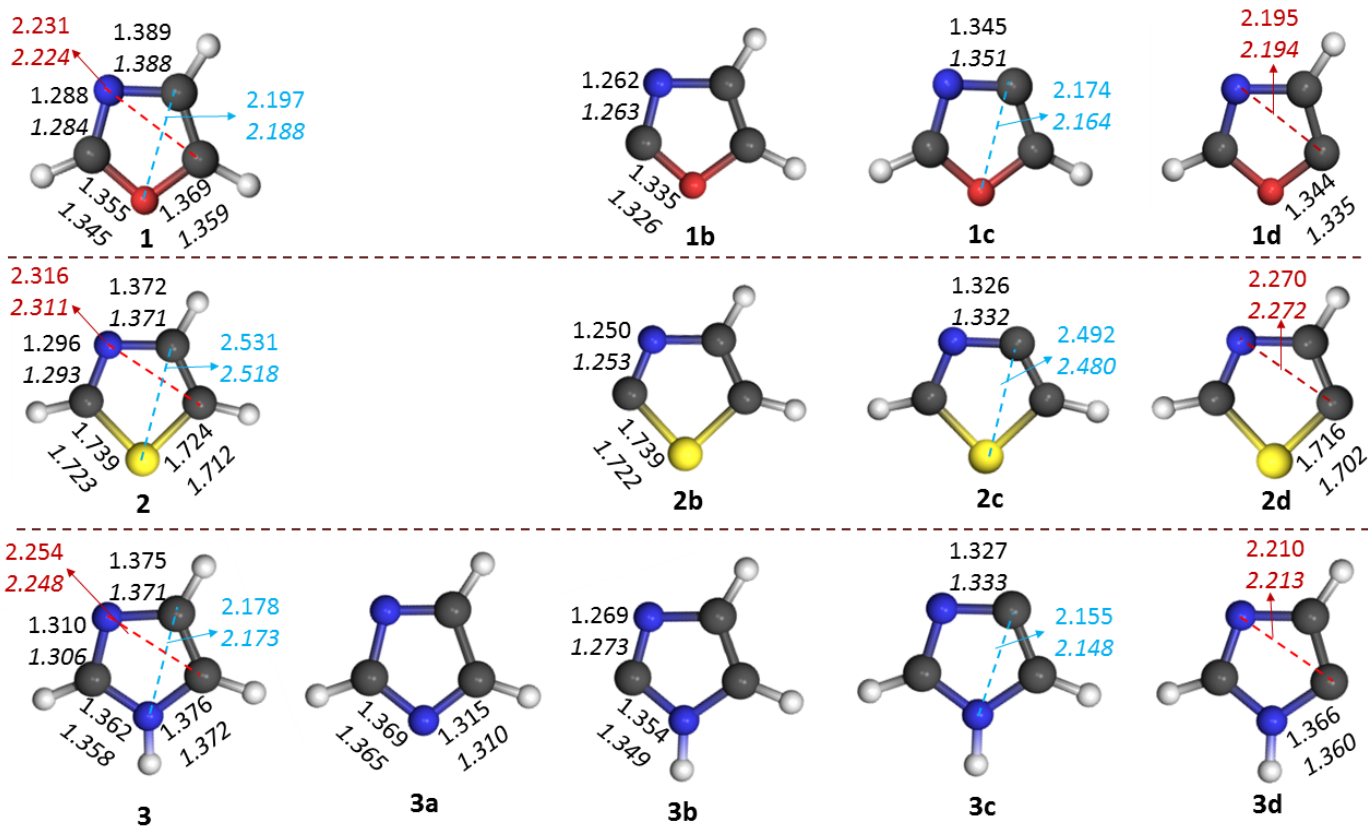

**Figure 2S.** Selected structural information of oxazole, thiazole, imidazole and their dehydro radicals (The bond distance between heteroatom and the radical centre in Å are indicated; The corresponding internuclear distances for the parent molecules are also separately mentioned; The values are obtained from (U)B3LYP/cc-pVTZ (normal font) and (U)M06-2X/cc-pVTZ (italics) levels of theory)

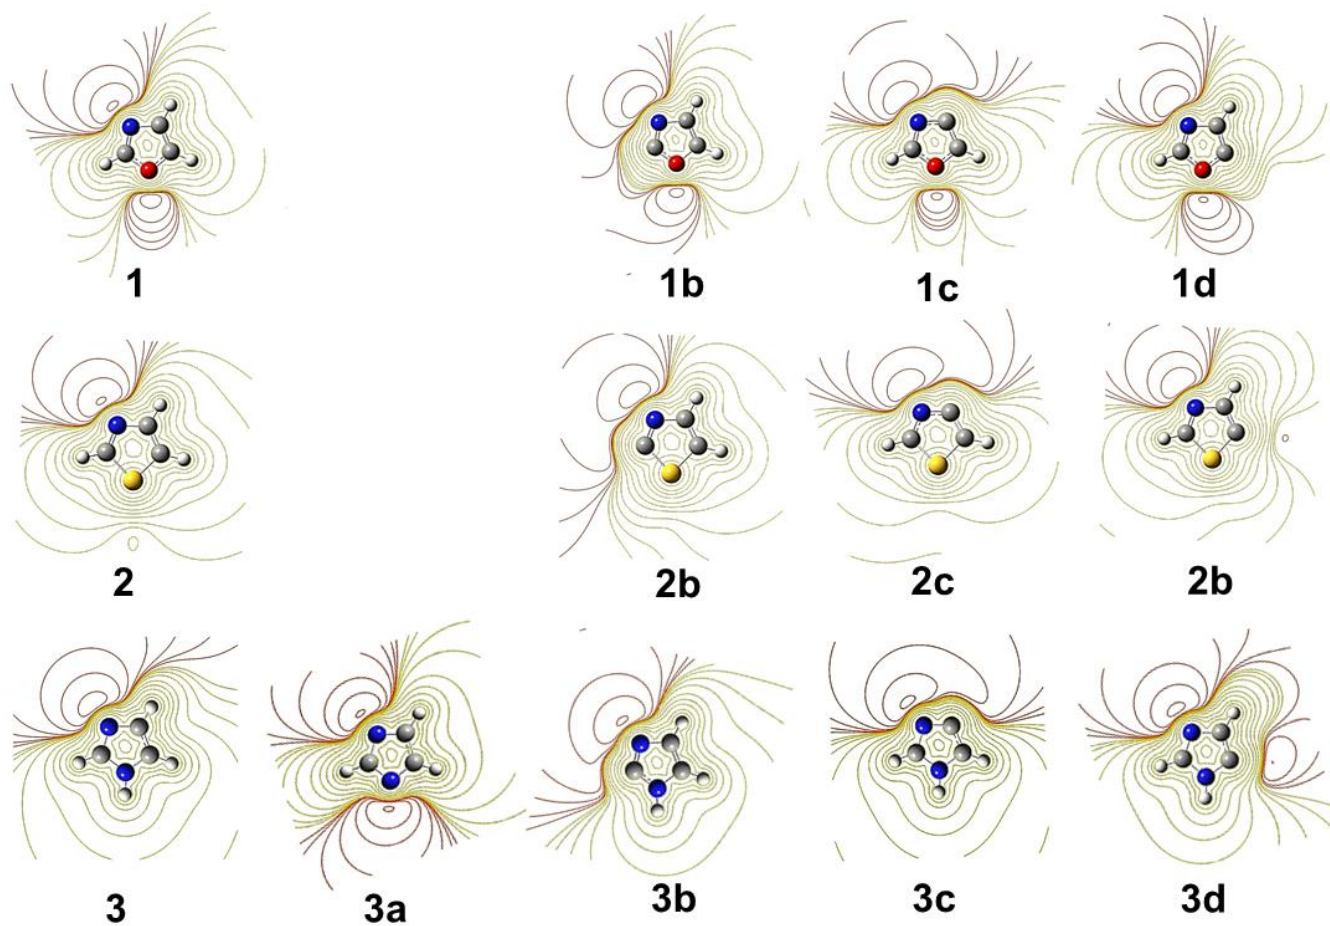

**Figure 3S:** Two dimensional electrostatic potential surfaces of oxazole, thiazole, imidazole and the ir ten isomeric radical species (The surfaces are obtained from (U)B3LYP/cc-pVTZ calculations and rendered at an isovalue of 0.002)

**Table 2S.** The hybridisation details of oxazole, thiazole, imidazole and their radical isomers<sup>a</sup>

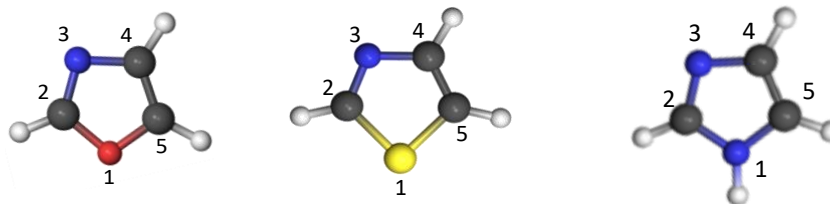

|                          | X <sub>1</sub> -C <sub>2</sub> bond                              | C <sub>2</sub> -N <sub>3</sub> bond                                                                        | N <sub>3</sub> -C <sub>4</sub> bond                                                                     | C <sub>4</sub> -C <sub>5</sub> bond                                                                         | C <sub>5</sub> -X <sub>1</sub> bond                                                                          |
|--------------------------|------------------------------------------------------------------|------------------------------------------------------------------------------------------------------------|---------------------------------------------------------------------------------------------------------|-------------------------------------------------------------------------------------------------------------|--------------------------------------------------------------------------------------------------------------|
| <b>Oxazole 1</b>         | C2: SP <sup>2.66</sup> (31.6%)<br>O1: SP <sup>4.40</sup> (68.4%) | C2: SP <sup>1.65</sup> (41.9%)<br>N3: SP <sup>1.89</sup> (58.0%)<br>And<br>C2: SP (41.7%)<br>N3: SP(58.2%) | C4: SP <sup>2.32</sup> (41.9%)<br>N3: SP <sup>2.36</sup> (58.1%)                                        | C4: SP <sup>1.75</sup> (49.5%)<br>C5: SP <sup>1.48</sup> (50.5%)<br>and<br>C4: SP (49.6%)<br>C5: SP (50.4%) | C5: SP <sup>3.06</sup> (31.7%)<br>O1: SP <sup>2.38</sup> (68.3%)                                             |
| <b>Thiazole 2</b>        | C2: SP <sup>2.48</sup> (49.6%)<br>S1: SP <sup>4.53</sup> (50.4%) | C2: SP <sup>1.72</sup> (41.5%)<br>N3: SP <sup>1.77</sup> (58.5%)<br>And<br>C2: SP (44.7%)<br>N3: SP(55.2%) | C4: SP <sup>2.22</sup> (41.5%)<br>N3: SP <sup>2.17</sup> (58.5%)                                        | C4: SP <sup>1.66</sup> (49.2%)<br>C5: SP <sup>1.54</sup> (50.8%)<br>and<br>C4: SP (45.6%)<br>C5: SP (54.4%) | C5: SP <sup>2.80</sup> (50.8%)<br>S1: SP <sup>4.19</sup> (49.2%)                                             |
| <b>Imidazole 3</b>       | C2: SP <sup>2.26</sup> (37.3%)<br>N1: SP <sup>1.86</sup> (62.7%) | C: SP <sup>1.80</sup> (42.6%)<br>N: SP <sup>1.96</sup> (57.4%)<br>and<br>C: SP (57.7%)<br>N: SP(42.3%)     | C: SP <sup>2.23</sup> (41.9%)<br>N: SP <sup>2.20</sup> (58.1%)                                          | C4: SP (51.4%)<br>C5: SP (48.6%)<br>and<br>C4: SP <sup>1.61</sup> (51.4%)<br>C5: SP <sup>1.74</sup> (48.6%) | C5: SP <sup>2.58</sup> (37.7%)<br>N1: SP <sup>1.84</sup> (62.4%)                                             |
| <b>1-dh imidazole 3a</b> | C2: SP <sup>1.97</sup> (59.3%)<br>N1: SP <sup>2.39</sup> (40.8%) | C: SP <sup>1.97</sup> (59.3%)<br>N: SP <sup>2.39</sup> (40.8%)                                             | C: SP <sup>1.99</sup> (58.7%)<br>N: SP <sup>1.92</sup> (41.3%)<br>And<br>C: SP (70.5%)<br>N: SP (29.5%) | C4: SP <sup>1.96</sup> (50.0%)<br>C5: SP <sup>1.96</sup> (50.0%)                                            | C5: SP <sup>1.99</sup> (58.7%)<br>N1: SP <sup>1.92</sup> (41.3%)<br>And<br>C5: SP (70.52%)<br>N1: SP (29.5%) |
| <b>2-dh oxazole 1b</b>   | C2: SP <sup>3.13</sup> (29.4%)<br>O1: SP <sup>2.49</sup> (70.5%) | C2: SP <sup>1.63</sup> (39.1%)<br>N3: SP <sup>1.94</sup> (60.8%)<br>And<br>C2: SP (40.6%)<br>N3: SP(59.4%) | C4: SP <sup>2.37</sup> (43.0%)<br>N3: SP <sup>2.60</sup> (56.9%)                                        | C4: SP <sup>1.72</sup> (49.7%)<br>C5: SP <sup>1.47</sup> (50.3%)<br>and<br>C4: SP (50.1%)<br>C5: SP (49.6%) | C5: SP <sup>3.15</sup> (32.3%)<br>O1: SP <sup>2.75</sup> (67.7%)                                             |
| <b>2-dh thiazole 2b</b>  | C2: SP <sup>3.62</sup> (45.3%)<br>S1: SP <sup>4.34</sup> (54.7%) | C2: SP <sup>1.67</sup> (38.1%)<br>N3: SP <sup>1.59</sup> (61.9%)<br>And<br>C2: SP (41.1%)<br>N3: SP(58.9%) | C4: SP <sup>2.31</sup> (42.1%)<br>N3: SP <sup>2.33</sup> (57.9%)                                        | C4: SP <sup>1.65</sup> (49.6%)<br>C5: SP <sup>1.51</sup> (50.4%)<br>and<br>C4: SP (47.7%)<br>C5: SP (52.3%) | C5: SP <sup>2.84</sup> (51.5%)<br>S1: SP <sup>4.88</sup> (48.5%)                                             |
| <b>2-dh imidazole 3b</b> | C2: SP <sup>1.15</sup> (36.9%)<br>N1: SP <sup>2.14</sup> (63.1%) | C2: SP <sup>1.18</sup> (39.5%)<br>N3: SP <sup>1.67</sup> (60.5%)<br>And<br>C2: SP (34.5%)<br>N3: SP(62.5%) | C4: SP <sup>2.41</sup> (39.5%)<br>N3: SP <sup>2.35</sup> (60.5%)                                        | C4: SP <sup>1.68</sup> (48.8%)<br>C5: SP <sup>1.60</sup> (51.2%)<br>and<br>C4: SP (48.1%)<br>C5: SP(51.9%)  | C5: SP <sup>2.64</sup> (36.7%)<br>N1: SP <sup>1.64</sup> (63.3%)                                             |
| <b>4-dh oxazole 1c</b>   | C2: SP <sup>2.62</sup> (31.9%)<br>O1: SP <sup>2.35</sup> (68.1%) | C2: SP <sup>1.69</sup> (42.5%)<br>N3: SP <sup>2.01</sup> (57.5%)<br>And<br>C2: SP (41.0%)<br>N3: SP(58.9%) | C4: SP <sup>2.22</sup> (39.2%)<br>N3: SP <sup>2.28</sup> (60.8%)                                        | C4: SP <sup>1.73</sup> (46.6%)<br>C5: SP <sup>1.52</sup> (53.4%)<br>and<br>C4: SP (48.9%)<br>C5: SP (51.1%) | C5: SP <sup>3.27</sup> (30.7%)<br>O1: SP <sup>2.40</sup> (69.3%)                                             |

|                              |                                                                  |                                                                                                             |                                                                  |                                                                                                                       |                                                                  |
|------------------------------|------------------------------------------------------------------|-------------------------------------------------------------------------------------------------------------|------------------------------------------------------------------|-----------------------------------------------------------------------------------------------------------------------|------------------------------------------------------------------|
| <b>4-dh thiazole<br/>2c</b>  | C2: SP <sup>2.46</sup> (50.2%)<br>S1: SP <sup>4.44</sup> (49.8%) | C2: SP <sup>1.74</sup> (42.1%)<br>N3: SP <sup>1.94</sup> (57.9%)<br>And<br>C2: SP (44.3%)<br>N3: SP (55.7%) | C4: SP <sup>2.09</sup> (39.0%)<br>N3: SP <sup>2.08</sup> (60.9%) | C4: SP <sup>1.60</sup> (46.4%)<br>C5: SP <sup>1.54</sup> (53.6%)<br>and<br>C4: SP (44.9%)<br>C5: SP (55.1%)           | C5: SP <sup>3.16</sup> (48.1%)<br>S1: SP <sup>4.28</sup> (51.9%) |
| <b>4-dh imidazole<br/>3c</b> | C2: SP (72.4%)<br>N1: SP (27.6%)                                 | C2: SP <sup>1.99</sup> (61.2%)<br>N3: SP <sup>0.90</sup> (38.8%)                                            | C4: SP <sup>1.19</sup> (66.0%)<br>N3: SP <sup>1.14</sup> (34.0%) | C4: SP <sup>0.85</sup> (53.3%)<br>C5: SP <sup>1.78</sup> (46.7%)<br>And<br>C4: SP (59.4%)<br>C5: SP (40.7%)           | C5: SP <sup>2.37</sup> (38.2%)<br>N1: SP <sup>1.88</sup> (61.8%) |
| <b>5-dh oxazole<br/>1d</b>   | C2: SP <sup>2.72</sup> (32.2%)<br>O1: SP <sup>2.63</sup> (67.8%) | C2: SP <sup>1.66</sup> (42.5%)<br>N3: SP <sup>1.87</sup> (58.2%)<br>And<br>C2: SP (41.3%)<br>N3: SP (58.7%) | C4: SP <sup>2.45</sup> (41.0%)<br>N3: SP <sup>2.28</sup> (58.9%) | C4: SP <sup>1.73</sup> (46.6%)<br>C5: SP <sup>1.52</sup> (53.4%)<br>and<br>C4: SP (48.9%)<br>C5: SP (51.1%)           | C5: SP <sup>3.30</sup> (29.8%)<br>O1: SP <sup>2.49</sup> (70.2%) |
| <b>5-dh thiazole<br/>2d</b>  | C2: SP <sup>2.50</sup> (50.7%)<br>S1: SP <sup>5.04</sup> (49.3%) | C2: SP <sup>1.70</sup> (41.3%)<br>N3: SP <sup>1.72</sup> (58.7%)<br>And C2: SP (43.3%)<br>N3: SP (56.7%)    | C4: SP <sup>2.36</sup> (40.6%)<br>N3: SP <sup>2.13</sup> (59.4%) | C4: SP <sup>1.71</sup> (52.4%)<br>C5: SP <sup>1.43</sup> (47.6%)<br>and<br>C4: SP (45.4%)<br>C5: SP (54.6%)           | C5: SP <sup>3.13</sup> (48.7%)<br>S1: SP <sup>4.27</sup> (51.3%) |
| <b>5-dh imidazole<br/>3d</b> | C2: SP <sup>2.26</sup> (36.4%)<br>N1: SP <sup>1.73</sup> (63.6%) | C2: SP <sup>1.82</sup> (42.7%)<br>N3: SP <sup>2.04</sup> (57.3%)<br>And<br>C2: SP (43.1%)<br>N3: SP (56.9%) | C4: SP <sup>2.06</sup> (43.5%)<br>N3: SP <sup>2.91</sup> (56.5%) | C4: SP <sup>2</sup> (51.1%)<br>C5: SP <sup>0.84</sup> (48.9%)<br>And<br>C4: SP <sup>1</sup> (56.7%)<br>C5: SP (43.2%) | C5: SP <sup>1.58</sup> (35.2%)<br>N1: SP <sup>2.0</sup> (64.8%)  |

<sup>a</sup>The values are obtained from NBO calculations at (U)B3LYP/cc-pVTZ level of theory; The contribution of any particular atom to corresponding bond hybridisation is given in parentheses. The numbering is indicated for the parent compounds.

**Table 3S:** The second order perturbation energy from the NBO analysis at (U)B3LYP/cc-pVTZ level of theory.

| Species   |    | Donor NBO   | Acceptor NBO               | E (2)<br>(kcal/mol) |
|-----------|----|-------------|----------------------------|---------------------|
| oxazole   | 1b | LP(N3)      | LP*(C2)<br>BD*(C2-O1)      | 7.0<br>3.9          |
|           |    | LP1(O1)     | LP*(C2)                    | 0.4                 |
|           |    | LP2(O1)     | BD*(C2-N3)<br>BD*(C4-C5)   | 18.7<br>10.5        |
|           | 1c | LP(N3)      | LP*(C4)<br>BD*(C4-C5)      | 7.17<br>2.2         |
|           |    | LP1(O1)     | LP*(C4)                    | 0.3                 |
|           |    | LP2(O1)     | BD*(C2-N3)<br>BD*(C4-C5)   | 19.1<br>8.8         |
|           | 1d | LP(N3)      | LP*(C5)<br>BD*(C4-C5)      | 1.1<br>3.0          |
|           |    | LP1(O1)     | LP*(C5)                    | 1.7                 |
|           |    | LP2(O1)     | BD*(C2-N3)<br>BD*(C4-C5)   | 16.0<br>14.3        |
| Thiazole  | 2b | LP(N3)      | LP*(C2)<br>BD*(C2-S1)      | 19.0<br>3.2         |
|           |    | LP1(S1)     | LP*(C2)                    | 2.3                 |
|           |    | LP2(O1)     | BD*(C2-N3)<br>BD*(C4-C5)   | 13.5<br>9.4         |
|           | 2c | LP(N3)      | LP*(C4)<br>BD*(C4-C5)      | 10.6<br>2.9         |
|           |    | LP1(O1)     | LP*(C4)                    | 0.0                 |
|           |    | LP2(O1)     | BD*(C2-N3)<br>BD*(C4-C5)   | 16.5<br>6.8         |
|           | 2d | LP(N3)      | LP*(C5)<br>BD*(C4-C5)      | 1.1<br>3.7          |
|           |    | LP1(O1)     | LP*(C5)                    | 0.7                 |
|           |    | LP2(O1)     | BD*(C2-N3)<br>BD*(C4-C5)   | 13.7<br>11.5        |
| Imidazole | 3a | LP (N3)     | BD* (N1-C2)<br>BD* (C4-C5) | 3.7<br>3.7          |
|           |    | LP (N1)     | BD* (N3-C2)<br>BD* (C4-C5) | 3.8<br>3.6          |
|           |    | LP (N3)     | LP* (C2)<br>BD* (C2-N1)    | 9.2<br>2.8          |
|           | 3b | LP (N1)     | BD* (C2-N3)<br>BD* (C4-C5) | 22.7<br>14.5        |
|           |    | LP (N3)     | BD* (N1-C2)<br>BD* (C4-C5) | 81.0<br>28.9        |
|           | 3c | BD* (N1-C2) | BD* (C4-C5)                | 6.2                 |
|           |    | LP (N3)     | LP* (C5)<br>BD* (C3-C4)    | 1.1<br>3.4          |
|           | 3d | LP (N1)     | BD* (C2-N3)<br>BD* (C4-C5) | 22.6<br>16.9        |

LP = bonding orbital of lone pair, LP\* = antibonding molecular orbital of lone pair, BD\* = antibonding orbital of the particular bond mentioned



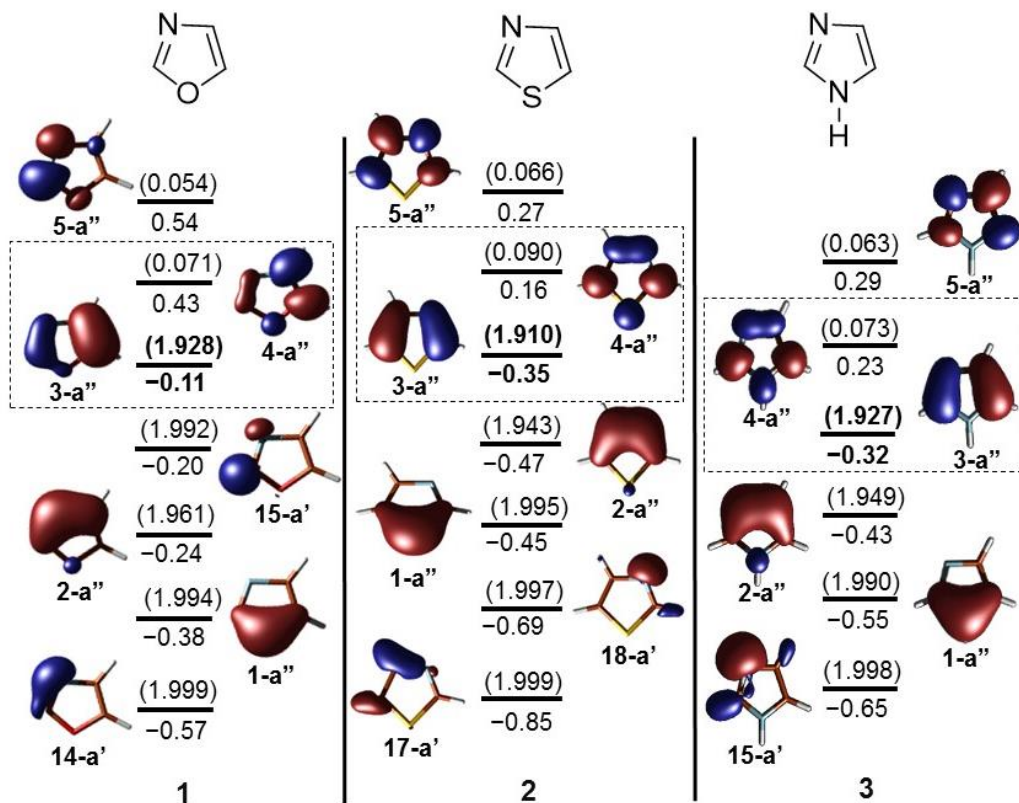

**Figure 4S:** Molecular orbital diagram of parent heterocyclic molecules at CASSCF/cc-pVTZ//*(U)*B3LYP/cc-pVTZ (The active space orbitals are indicated along with their energies in hartrees and natural orbital occupancy numbers (NOON) in parentheses; the orbital symmetries are indicated below each one of them. The highest occupied molecular orbital (HOMO) and lowest unoccupied molecular orbital (LUMO) have been highlighted by a box; The parameters corresponding to HOMO are indicated in bold; All the orbitals have been rendered at an isovalue 0.05)

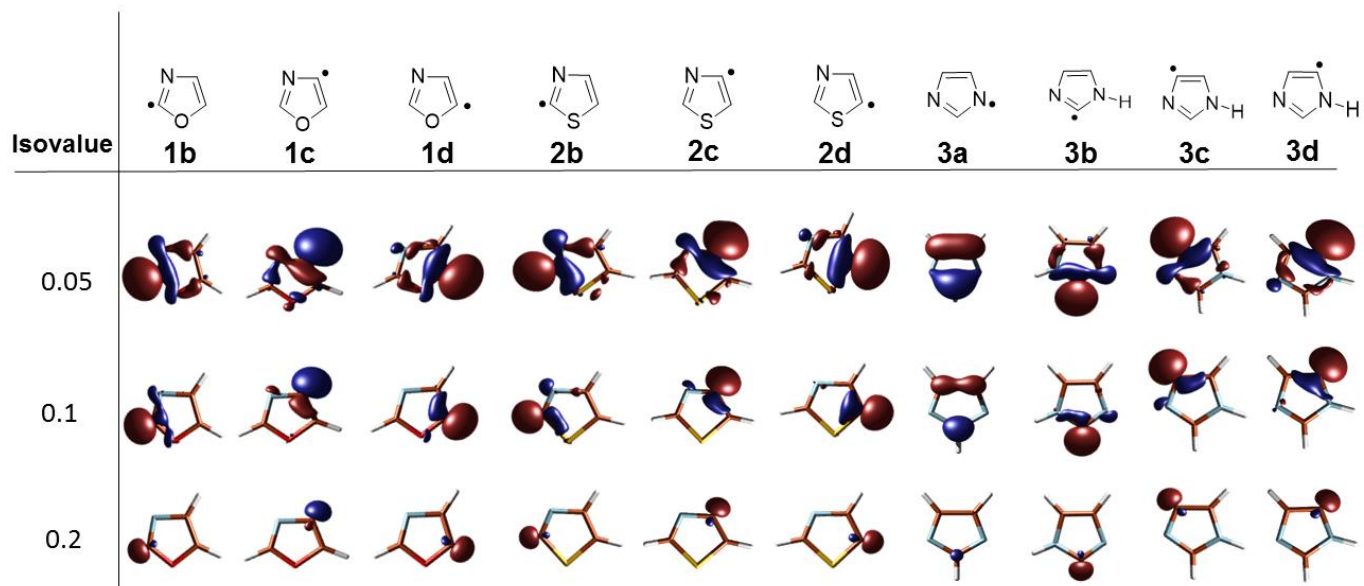

**Figure 5S:** Singly occupied molecular orbital's (SOMO) of dehydro- oxazole, thiazole, and imidazole radical isomers; (The SOMO's obtained at CASSCF/cc-pVTZ/(U)B3LYP/cc-pVTZ have been rendered at different isovalues; The corresponding isovalues are indicated at the left column; The corresponding structure of each radical is also indicated at the top)

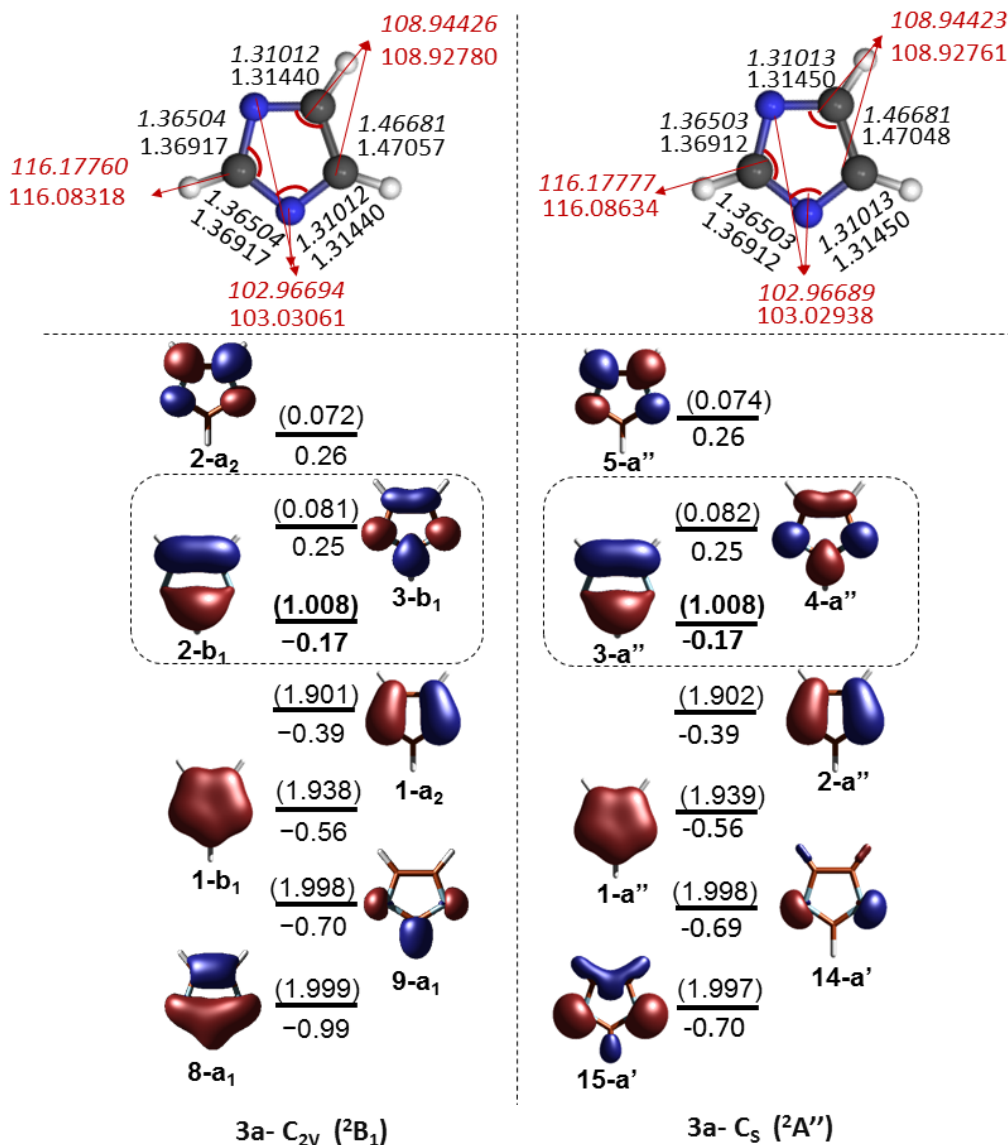

**Figure 6S.** The important geometrical parameters and molecular orbital diagram of **3a** corresponding to both C<sub>2v</sub> and C<sub>s</sub> symmetry. The normal font denotes bond lengths and bond angles obtained at (U)B3LYP/cc-pVTZ level of theory and the parameters in italics corresponds to the (U)M06-2X/cc-pVTZ level of theory. The MO orbitals are calculated at CASSCF/cc-pVTZ/(U)B3LYP/cc-pVTZ using Molpro. The active space orbitals are indicated along with their energies in hartrees and natural orbital occupancy numbers (NOON) in parentheses; the orbital symmetries are indicated below each one of them.

**Table 4S:** The energy difference between C<sub>s</sub> and C<sub>2v</sub> structure of **3a** at different levels of theory.

| Level of theory                     | Energy of C <sub>s</sub> structure (Hartrees) | Energy of C <sub>2v</sub> structure (Hartrees) | ΔE (C <sub>s</sub> -C <sub>2v</sub> ) kcal/mol |
|-------------------------------------|-----------------------------------------------|------------------------------------------------|------------------------------------------------|
| UB3LYP/cc-pVTZ                      | -225.57940522                                 | -225.57940420                                  | -0.00062751                                    |
| CCSD(T)/cc-pVTZ// UB3LYP/cc-pVTZ    | -225.12538971                                 | -225.12539012                                  | 0.00025720                                     |
| (U)M06-2X/cc-pVTZ                   | -225.48605487                                 | -225.48605487                                  | 0.00000000                                     |
| CCSD(T)/cc-pVTZ// (U)M06-2X/cc-pVTZ | -225.12530511                                 | -225.12530509                                  | -0.00001255                                    |

**TABLE 5S.** The bond dissociation energy (BDE) values for the radical formation of all oxazole, thiazole and imidazole radical isomers, obtained from calculations at (U)B3LYP/cc-pVTZ level of theory.

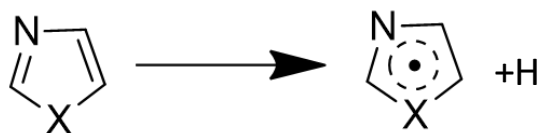

| Species          | Enthalpy (Hartrees) | Enthalpy of parent (Hartrees) | BDE (kcal/mol) |       |
|------------------|---------------------|-------------------------------|----------------|-------|
| <b>1b</b>        | -245.41175          |                               | 116.2          |       |
| <b>Oxazole</b>   | <b>1c</b>           | -245.41260                    | -246.09913     | 115.7 |
|                  | <b>1d</b>           | -245.40800                    |                | 118.6 |
|                  | <b>2b</b>           | -568.41163                    |                | 108.1 |
| <b>Thiazole</b>  | <b>2c</b>           | -568.40711                    | -569.08615     | 111.0 |
|                  | <b>2d</b>           | -568.39903                    |                | 116.1 |
|                  | <b>3a</b>           | -225.57475                    |                | 93.3  |
| <b>Imidazole</b> | <b>3b</b>           | -225.54255                    |                | 113.5 |
|                  | <b>3c</b>           | -225.54177                    | -226.22558     | 114.0 |
|                  | <b>3d</b>           | -225.53669                    |                | 117.2 |

Enthalpy of Hydrogen atom at (U)B3LYP/cc-pVTZ = - 0.50216 Hartrees

**Table 6S:** Rate constant of all the reaction channels for both oxazole and thiazole radical as obtained from (U)B3LYP/cc-pVTZ level of theory. All rate constant values are in s<sup>-1</sup>

| S. No. | Species  | Isomer | Reaction | $\Delta G_{\text{product-reactant}}$<br>(kcal/mol) | $\Delta S_{\text{product-reactant}}$<br>(cal/mol.K) | k (s <sup>-1</sup> )   |       |                        |
|--------|----------|--------|----------|----------------------------------------------------|-----------------------------------------------------|------------------------|-------|------------------------|
| 1      | Oxazole  | 1b     | 1b-8     | 18.90                                              | 6.96                                                | $5.77 \times 10^{-14}$ |       |                        |
|        |          |        | 8-10,11  | -13.75                                             | 29.15                                               | $3.49 \times 10^6$     |       |                        |
|        |          |        | 1b-9     | -13.46                                             | 7.36                                                | $8.64 \times 10^{-7}$  |       |                        |
|        |          |        | 9-10,11  | 18.61                                              | 28.75                                               | $2.59 \times 10^{-6}$  |       |                        |
|        |          | 1c     | 1c-21    | -3.72                                              | 8.71                                                | $3.23 \times 10^{-10}$ |       |                        |
|        |          |        | 21-22    | 4.41                                               | -1.59                                               | $1.15 \times 10^{-22}$ |       |                        |
|        |          |        | 22-25,26 | -13.25                                             | 33.45                                               | $2.91 \times 10^3$     |       |                        |
|        |          |        | 1c-23    | 22.18                                              | 9.63                                                | $2.12 \times 10^{-17}$ |       |                        |
|        |          | 1d     | 23-24    | -14.58                                             | -3.29                                               | $1.35 \times 10^{-3}$  |       |                        |
|        |          |        | 24-25,6  | 8.52                                               | 35.79                                               | $1.52 \times 10^{-3}$  |       |                        |
|        |          |        | 1d-36    | 25.90                                              | 7.01                                                | $1.15 \times 10^{-18}$ |       |                        |
|        |          |        | 36-7,38  | -36.18                                             | 34.14                                               | $3.06 \times 10^8$     |       |                        |
|        |          | 2      | thiazole | 2b                                                 | 1d-37                                               | -2.38                  | 7.53  | 4.89                   |
|        |          |        |          |                                                    | 37-7,38                                             | -7.90                  | 33.62 | $3.82 \times 10^3$     |
|        |          |        |          |                                                    | 1d-21                                               | -6.58                  | 8.62  | $3.84 \times 10^{-19}$ |
|        |          |        |          |                                                    | 2b-12                                               | 19.78                  | 8.37  | $4.58 \times 10^{-13}$ |
| 2c     | 12-11,14 |        |          | -5.38                                              | 17.83                                               | $1.73 \times 10^{10}$  |       |                        |
|        | 2b-13    |        |          | 8.84                                               | 8.20                                                | $4.49 \times 10^{-14}$ |       |                        |
|        | 13-11,14 |        |          | 5.55                                               | 17.83                                               | $4.88 \times 10^{-3}$  |       |                        |
|        | 2b-15    |        |          | 6.56                                               | 6.25                                                | $1.33 \times 10^2$     |       |                        |
| 2d     | 15-16    |        |          | 19.68                                              | 2.02                                                | $1.27 \times 10^{-21}$ |       |                        |
|        | 15-17    |        |          | 46.29                                              | 25.33                                               | $4.62 \times 10^{-28}$ |       |                        |
|        | 16-17    |        |          | 26.61                                              | 23.31                                               | $1.29 \times 10^{-10}$ |       |                        |
|        | 2c-27    |        |          | 15.77                                              | 5.79                                                | $1.16 \times 10^{-4}$  |       |                        |
| 3a     | 27-28    |        |          | 4.83                                               | 0.87                                                | $2.22 \times 10^{-24}$ |       |                        |
|        | 28-31,36 |        |          | 23.49                                              | 36.09                                               | $6.10 \times 10^{-16}$ |       |                        |
|        | 2c-29    |        |          | 32.57                                              | 8.75                                                | $1.70 \times 10^{-21}$ |       |                        |
|        | 29-30    |        |          | -8.98                                              | -1.4                                                | $5.94 \times 10^{-6}$  |       |                        |
| 3b     | 30-7,32  | -19.28 | 22.58    | $5.7 \times 10^9$                                  |                                                     |                        |       |                        |
|        | 2d-39    | 18.67  | 8.51     | $6.34 \times 10^{-14}$                             |                                                     |                        |       |                        |
|        | 39-7,32  | -19.40 | 21.32    | $9.32 \times 10^{10}$                              |                                                     |                        |       |                        |
|        | 2d-30    | 18.58  | 7.25     | $9.94 \times 10^{-4}$                              |                                                     |                        |       |                        |
| 3c     | 2d-27    | 8.65   | 7.29     | $2.08 \times 10^{-29}$                             |                                                     |                        |       |                        |
|        | 3a-5     | 48.43  | 6.66     | $1.7 \times 10^{-30}$                              |                                                     |                        |       |                        |
|        | 5-6,7    | 12.06  | 35.61    | $9.86 \times 10^{-8}$                              |                                                     |                        |       |                        |
|        | 3b-19    | 16.58  | 7.69     | $1.45 \times 10^{-21}$                             |                                                     |                        |       |                        |
| 3d     | 19-20,11 | -1.48  | 27.48    | 4.36                                               |                                                     |                        |       |                        |
|        | 3b-18    | 16.61  | 8.56     | $1.49 \times 10^{-14}$                             |                                                     |                        |       |                        |
|        | 18-20,11 | 1.45   | 26.61    | $9.59 \times 10^{-3}$                              |                                                     |                        |       |                        |
|        | 3c-33    | 13.48  | 7.88     | $1.71 \times 10^{-20}$                             |                                                     |                        |       |                        |
| 3d     | 33-34    | 11.39  | 0.123    | $1.44 \times 10^{-29}$                             |                                                     |                        |       |                        |
|        | 34-26,35 | -0.87  | 35.79    | $1.28 \times 10^{-4}$                              |                                                     |                        |       |                        |
|        | 3d-41    | 21.33  | 7.87     | $8.16 \times 10^{-17}$                             |                                                     |                        |       |                        |
|        | 41-26,7  | -14.15 | 34.73    | $3.32 \times 10^3$                                 |                                                     |                        |       |                        |
| 3d     | 3d-42    | 17.48  | 7.62     | $1.90 \times 10^{-15}$                             |                                                     |                        |       |                        |
|        | 41-26,7  | -10.30 | 34.98    | $3.35 \times 10^1$                                 |                                                     |                        |       |                        |

**Table 7S:** Properties of reactants, intermediates, products and transition states of unimolecular decomposition pathways of dehydro-oxazole, thiazole and imidazole radicals at (U)B3LYP/cc-pVTZ levels of theory.

| Species                        | Lowest harmonic frequency | Absolute energy (Hartrees) | ZVPE (Hartrees) | <S <sup>2</sup> > (annihilated) |        | Point Group     | Electronic structure        | $\Delta G$ (Hartrees) | $\Delta H$ (Hartrees) | Spin density                       |
|--------------------------------|---------------------------|----------------------------|-----------------|---------------------------------|--------|-----------------|-----------------------------|-----------------------|-----------------------|------------------------------------|
|                                |                           |                            |                 | Before                          | After  |                 |                             |                       |                       |                                    |
| <b>3a</b>                      | 516.64                    | -225.6363                  | 0.0567          | 0.7654                          | 0.7502 | C <sub>s</sub>  | <sup>2</sup> B1             | -225.6062             | -225.5747             | 0.49 (C2); 0.35 (C4=C5)            |
| <b>TS<sub>3a-5</sub></b>       | 380.29(i)                 | -225.5383                  | 0.0519          | 0.7807                          | 0.7505 | C <sub>1</sub>  | <sup>2</sup> A              | -225.5137             | -225.4811             | 0.92 (N1)                          |
| <b>5</b>                       | 151.52                    | -225.5526                  | 0.0521          | 0.7703                          | 0.7502 | C <sub>1</sub>  | <sup>2</sup> A              | -225.5290             | -225.4944             | 0.97 (N1)                          |
| <b>TS<sub>5-6,7</sub></b>      | 447.73(i)                 | -225.5033                  | 0.0473          | 0.7815                          | 0.7505 | C <sub>1</sub>  | <sup>2</sup> A              | -225.4860             | -225.4491             | 0.49 (C2); 0.38 (C4)               |
| <b>6</b>                       | 427.53                    | -132.0498                  | 0.0285          | 0.7711                          | 0.7501 | C <sub>1</sub>  | <sup>2</sup> A              | -132.0455             | -132.0167             | 0.56 (C2); 0.56 (C4)               |
| <b>7</b>                       | 762.11                    | -93.46137                  | 0.0163          | 0.0000                          | 0.0000 | C <sub>∞v</sub> | <sup>1</sup> Σ              | -93.4644              | -93.4415              | -                                  |
| <b>1b</b>                      | 563.70                    | -245.4616                  | 0.0454          | 0.7577                          | 0.7500 | C <sub>s</sub>  | <sup>2</sup> A'             | -245.4429             | -245.4117             | 0.87 (C2)                          |
| <b>TS<sub>1b-8</sub></b>       | 489.00(i)                 | -245.3998                  | 0.0406          | 0.7866                          | 0.7505 | C <sub>1</sub>  | <sup>2</sup> A              | -245.3864             | -245.3541             | 0.76 (C4); 0.39 (C2)               |
| <b>TS<sub>1b-9</sub></b>       | 598.31(i)                 | -245.4153                  | 0.0405          | 0.7721                          | 0.7502 | C <sub>1</sub>  | <sup>2</sup> A              | -245.4020             | -245.3699             | 0.60 (C5); 0.49 (C2)               |
| <b>8</b>                       | 163.55                    | -245.4253                  | 0.0409          | 0.7591                          | 0.7500 | C <sub>s</sub>  | <sup>2</sup> A'             | -245.4128             | -245.3783             | 0.97 (C4)                          |
| <b>9</b>                       | 123.32                    | -245.4775                  | 0.0418          | 0.7610                          | 0.7500 | C <sub>s</sub>  | <sup>2</sup> A'             | -245.4644             | -245.4297             | 0.99 (C5)                          |
| <b>TS<sub>8-10,11</sub></b>    | 568.62(i)                 | -245.4072                  | 0.0377          | 0.7715                          | 0.7503 | C <sub>1</sub>  | <sup>2</sup> A              | -245.3993             | -245.3630             | 0.59 (C4); 0.21 (N3)<br>0.34 (O1)  |
| <b>TS<sub>9-10,11</sub></b>    | 303.92(i)                 | -245.4321                  | 0.0381          | 0.7641                          | 0.7501 | C <sub>1</sub>  | <sup>2</sup> A              | -245.4245             | -245.3874             | 0.38 (C5); 0.49 (N3)<br>0.19 (O1)  |
| <b>10</b>                      | 509.64                    | -168.0673                  | 0.0100          | 0.7624                          | 0.7501 | C <sub>∞v</sub> | -                           | -168.0793             | -168.0536             | 0.36 (O1); 0.71 (N3)               |
| <b>11</b>                      | 649.92                    | -77.3635                   | 0.0269          | 0.0000                          | 0.0000 | D <sub>∞h</sub> | <sup>1</sup> Σ <sub>g</sub> | -77.3555              | -77.3328              | -                                  |
| <b>2b</b>                      | 446.13                    | -568.4589                  | 0.0424          | 0.7566                          | 0.7500 | C <sub>s</sub>  | <sup>2</sup> A'             | -568.4443             | -568.4116             | 0.73 (C2)                          |
| <b>TS<sub>2b-12</sub></b>      | 424.72(i)                 | -568.3990                  | 0.0376          | 0.7749                          | 0.7503 | C <sub>1</sub>  | <sup>2</sup> A              | -568.3897             | -568.3558             | 0.76 (C4); 0.32 (C2)               |
| <b>TS<sub>2b-13</sub></b>      | 409.39(i)                 | -568.3980                  | 0.0387          | 0.7913                          | 0.7505 | C <sub>1</sub>  | <sup>2</sup> A              | -568.3875             | -568.3541             | 0.73 (C5); 0.37 (C2)               |
| <b>TS<sub>2b-15</sub></b>      | 447.60(i)                 | -568.4324                  | 0.0392          | 0.7665                          | 0.7501 | C <sub>1</sub>  | <sup>2</sup> A              | -568.4214             | -568.3879             | 0.64 (S1); 0.21 (C2)<br>0.16 (C4)  |
| <b>12</b>                      | 131.29                    | -568.4202                  | 0.0374          | 0.7604                          | 0.7501 | C <sub>1</sub>  | <sup>2</sup> A              | -568.4128             | -568.3761             | 0.96 (C4)                          |
| <b>13</b>                      | 66.47                     | -568.4393                  | 0.0392          | 0.7627                          | 0.7501 | C <sub>1</sub>  | <sup>2</sup> A              | -568.4302             | -568.3936             | 1.01 (C5)                          |
| <b>15</b>                      | 112.18                    | -568.4451                  | 0.0408          | 0.7543                          | 0.7500 | C <sub>1</sub>  | <sup>2</sup> A              | -568.4338             | -568.3982             | 0.99 (S1)                          |
| <b>15a</b>                     | 112.54                    | -568.4263                  | 0.0404          | 0.7553                          | 0.7500 | C <sub>1</sub>  | <sup>2</sup> A              | -568.4159             | -568.3795             | 0.57 (C5); 0.36 (S1)               |
| <b>15b</b>                     | 290.60                    | -132.1084                  | 0.0306          | 0.7611                          | 0.7501 | C <sub>1</sub>  | <sup>2</sup> A              | -132.1022             | -132.0731             | 0.82 (C4); 0.32 (C5)               |
| <b>TS<sub>12-14,11</sub></b>   | 335.00(i)                 | -568.4117                  | 0.0356          | 0.7714                          | 0.7502 | C <sub>1</sub>  | <sup>2</sup> A              | -568.4072             | -568.3691             | 0.51 (C4); 0.56 (S1)<br>0.13 (N3)  |
| <b>TS<sub>13-14,11</sub></b>   | 502.90(i)                 | -568.4023                  | 0.0359          | 0.7735                          | 0.7503 | C <sub>1</sub>  | <sup>2</sup> A              | -568.3974             | -568.3596             | 0.48 (C5); 0.38 (S1)<br>0.29 (N3)  |
| <b>TS<sub>15-16</sub></b>      | 1742.73(i)                | -568.3638                  | 0.0335          | 0.7630                          | 0.7501 | C <sub>1</sub>  | <sup>2</sup> A              | -568.3607             | -568.3235             | 0.68 (C5); 0.39 (S1)               |
| <b>16</b>                      | 110.75                    | -568.4099                  | 0.0374          | 0.7573                          | 0.7500 | C <sub>1</sub>  | <sup>2</sup> A              | -568.4025             | -568.3659             | 0.76 (C5); 0.19 (S1)               |
| <b>TS<sub>16-17</sub></b>      | 114.12(i)                 | -568.3499                  | 0.0293          | 0.7528                          | 0.7500 | C <sub>1</sub>  | <sup>2</sup> A              | -568.3531             | -568.3129             | 0.97 (H)                           |
| <b>TS<sub>15-17</sub></b>      | 600.09(i)                 | -568.3461                  | 0.0303          | 0.7631                          | 0.7500 | C <sub>1</sub>  | <sup>2</sup> A              | -568.3466             | -568.3088             | 0.20 (S1); 0.91 (H)                |
| <b>TS<sub>15-15a</sub></b>     | 1454.78(i)                | -568.3737                  | 0.0356          | 0.7543                          | 0.7500 | C <sub>1</sub>  | <sup>2</sup> A              | -568.3678             | -568.3319             | 0.33 (C5); 0.54 (S1)               |
| <b>TS<sub>15a-15b,31</sub></b> | 180.54(i)                 | -568.3682                  | 0.0354          | 0.7682                          | 0.7502 | C <sub>1</sub>  | <sup>2</sup> A              | -568.3647             | -568.3255             | 0.70 (C4); 0.29 (C1);<br>0.08 (S1) |
| <b>14</b>                      | 434.22                    | -491.0548                  | 0.0072          | 0.7664                          | 0.7501 | C <sub>∞v</sub> | <sup>2</sup> A              | -491.0658             | -491.0434             | 0.45 (C4); 0.67 (S1)               |
| <b>17</b>                      | 119.78                    | -567.8477                  | 0.0291          | 0.0000                          | 0.0000 | C <sub>s</sub>  | <sup>1</sup> A'             | -567.8472             | -567.8126             | -                                  |
| <b>3b</b>                      | 445.16                    | -225.6054                  | 0.0619          | 0.7563                          | 0.7500 | C <sub>s</sub>  | <sup>2</sup> A'             | -225.5742             | -225.5425             | 0.82 (C2)                          |
| <b>TS<sub>3b-19</sub></b>      | 587.82(i)                 | -225.5257                  | 0.0520          | 0.7815                          | 0.7503 | C <sub>1</sub>  | <sup>2</sup> A              | -225.3994             | -225.367              | 0.71 (C5); 0.40 (C2)               |
| <b>19</b>                      | 134.55                    | -225.5653                  | 0.0514          | 0.7614                          | 0.7501 | C <sub>1</sub>  | <sup>2</sup> A              | -225.5430             | -225.5077             | 0.99 (C5)                          |
| <b>TS<sub>19-20,11</sub></b>   | 507(i)                    | -225.5355                  | 0.0490          | 0.7752                          | 0.7504 | C <sub>1</sub>  | <sup>2</sup> A              | -225.5166             | -225.4797             | 0.48 (C5); 0.30 (N1)<br>0.43 (N3)  |
| <b>20</b>                      | 471.21                    | -148.1868                  | 0.0196          | 0.7720                          | 0.7503 | C <sub>s</sub>  | <sup>2</sup> A''            | -148.1909             | -148.1629             | 0.62 (N1); 0.58 (N3)               |
| <b>TS<sub>3b-18</sub></b>      | 467.38(i)                 | -225.5417                  | 0.0531          | 0.7847                          | 0.7505 | C <sub>1</sub>  | <sup>2</sup> A              | -225.5163             | -225.4832             | 0.38 (C2); 0.78 (C4)               |

|                              |            |           |        |        |        |                 |                  |           |           |                                              |
|------------------------------|------------|-----------|--------|--------|--------|-----------------|------------------|-----------|-----------|----------------------------------------------|
| <b>18</b>                    | 153.46     | -225.5718 | 0.0532 | 0.7598 | 0.7500 | C <sub>5</sub>  | <sup>2</sup> A'' | -225.5478 | -225.5121 | 0.98 (C4)                                    |
| <b>TS<sub>18-20,11</sub></b> | 537.37(i)  | -225.5351 | 0.0495 | 0.7760 | 0.7504 | C <sub>1</sub>  | <sup>2</sup> A   | -225.5155 | -225.4791 | 0.49 (C4); 0.48 (N1)<br>0.27 (N3)            |
| <b>1c</b>                    | 601.48     | -245.4628 | 0.0458 | 0.7569 | 0.7500 | C <sub>5</sub>  | <sup>2</sup> A'  | -245.4437 | -245.4126 | 0.89 (C4)                                    |
| <b>TS<sub>1c-21</sub></b>    | 802.07(i)  | -245.4081 | 0.0401 | 0.7661 | 0.7501 | C <sub>1</sub>  | <sup>2</sup> A   | -245.3954 | -245.3628 | 0.41 (C4); 0.24 (N3)                         |
| <b>21</b>                    | 89.67      | -245.4609 | 0.0403 | 0.7671 | 0.7671 | C <sub>1</sub>  | <sup>2</sup> A   | -245.4497 | -245.4144 | 0.59 (C5); 0.46 (N3)                         |
| <b>TS<sub>1c-23</sub></b>    | 347.83(i)  | -245.3926 | 0.0401 | 0.7615 | 0.7615 | C <sub>1</sub>  | <sup>2</sup> A   | -245.3797 | -245.3474 | 0.79 (C4); 0.17 (C2)                         |
| <b>23</b>                    | 61.77      | -245.4181 | 0.0389 | 0.7699 | 0.7501 | C <sub>1</sub>  | <sup>2</sup> A   | -245.4084 | -245.3727 | 0.62 (C4); 0.48 (C2)                         |
| <b>TS<sub>21-22</sub></b>    | 1997.32(i) | -245.3739 | 0.0352 | 0.7571 | 0.7500 | C <sub>1</sub>  | <sup>2</sup> A   | -245.3672 | -245.3326 | 0.40 (C2); 0.24 (N3)                         |
| <b>22</b>                    | 154.28     | -245.4568 | 0.0426 | 0.7535 | 0.7500 | C <sub>1</sub>  | <sup>2</sup> A   | -245.4426 | -245.4081 | 0.66 (C2); 0.29 (O1)                         |
| <b>TS<sub>23-24</sub></b>    | 1059.71(i) | -245.3819 | 0.0357 | 0.7587 | 0.7500 | C <sub>1</sub>  | <sup>2</sup> A   | -245.3744 | -245.3402 | 0.68 (C2)                                    |
| <b>24</b>                    | 186.57     | -245.4443 | 0.0408 | 0.7551 | 0.7500 | C <sub>1</sub>  | <sup>2</sup> A   | -245.4316 | -245.3975 | 0.64 (C5); 0.29 (O1)                         |
| <b>TS<sub>22-25,26</sub></b> | 568.86(i)  | -245.4319 | 0.0386 | 0.7678 | 0.7502 | C <sub>1</sub>  | <sup>2</sup> A   | -245.4224 | -245.3869 | 0.33 (C5); 0.28 (C2)<br>0.39 (N3)            |
| <b>TS<sub>24-25,6</sub></b>  | 277.01(i)  | -245.4043 | 0.0359 | 0.7746 | 0.7503 | C <sub>1</sub>  | <sup>2</sup> A   | -245.3987 | -245.3614 | 0.42 (C4); 0.48 (C2)<br>0.12 (C5)            |
| <b>25</b>                    | 2211.73    | -113.3573 | 0.0050 | 0.0000 | 0.0000 | C <sub>∞v</sub> | <sup>1</sup> Σ   | -113.3713 | -113.3489 | -                                            |
| <b>26</b>                    | 341.63     | -132.0978 | 0.0294 | 0.7686 | 0.7501 | C <sub>1</sub>  | <sup>2</sup> A   | -132.0924 | -132.0635 | 0.64 (C5); 0.54 (N3)                         |
| <b>2c</b>                    | 466.02     | -568.4542 | 0.0423 | 0.7572 | 0.7500 | C <sub>5</sub>  | <sup>2</sup> A'  | -568.4396 | -568.4071 | 0.86 (C4)                                    |
| <b>TS<sub>2c-27</sub></b>    | 311.47(i)  | -568.4147 | 0.0396 | 0.7649 | 0.7501 | C <sub>1</sub>  | <sup>2</sup> A   | -568.4033 | -568.3699 | 0.51 (C4); 0.69 (C2)                         |
| <b>27</b>                    | 143.75     | -568.4267 | 0.0385 | 0.7919 | 0.7507 | C <sub>1</sub>  | <sup>2</sup> A   | -568.4178 | -568.3818 | 0.98 (S1)                                    |
| <b>TS<sub>2c-29</sub></b>    | 269.12(i)  | -568.3756 | 0.0374 | 0.7728 | 0.7503 | C <sub>1</sub>  | <sup>2</sup> A   | -568.3668 | -568.3327 | 0.74 (C4); 0.23 (C2)                         |
| <b>29</b>                    | 78.44      | -568.3950 | 0.0374 | 0.7977 | 0.7508 | C <sub>1</sub>  | <sup>2</sup> A   | -568.3877 | -568.3510 | 0.33 (C4); 0.61 (S1)<br>0.26 (C2)            |
| <b>TS<sub>27-28</sub></b>    | 1974.79(i) | -568.3391 | 0.0335 | 0.7566 | 0.7500 | C <sub>1</sub>  | <sup>2</sup> A   | -568.3354 | -568.2993 | 0.34 (S1); 0.33 (C2)<br>0.19 (N3)            |
| <b>28</b>                    | 123.02     | -568.4180 | 0.0407 | 0.7556 | 0.7500 | C <sub>1</sub>  | <sup>2</sup> A   | -568.4068 | -568.3711 | 0.41 (S1); 0.56 (C2)                         |
| <b>TS<sub>29-30</sub></b>    | 889.82(i)  | -568.3506 | 0.0328 | 0.7601 | 0.7501 | C <sub>1</sub>  | <sup>2</sup> A   | -568.3486 | -568.3109 | 0.69 (C2)                                    |
| <b>30</b>                    | 103.00     | -568.4112 | 0.0388 | 0.7561 | 0.7500 | C <sub>1</sub>  | <sup>2</sup> A   | -568.4021 | -568.3660 | 0.55 (C5); 0.37 (S1)                         |
| <b>TS<sub>28-26,31</sub></b> | 359.29(i)  | -568.3502 | 0.0352 | 0.7768 | 0.7505 | C <sub>1</sub>  | <sup>2</sup> A   | -568.3459 | -568.3081 | 0.47 (C5); 0.11 (S1)<br>0.11 (C2); 0.46 (N3) |
| <b>TS<sub>30-7,32</sub></b>  | 489.76(i)  | -568.4009 | 0.0359 | 0.7593 | 0.7501 | C <sub>1</sub>  | <sup>2</sup> A   | -568.3955 | -568.3584 | 0.25 (C4); 0.11 (C5)<br>0.34 (S1); 0.27 (C2) |
| <b>31</b>                    | 1304.18    | -436.2593 | 0.0029 | 0.0000 | 0.0000 | C <sub>∞v</sub> | <sup>1</sup> Σ   | -436.2769 | -436.2530 | -                                            |
| <b>32</b>                    | 367.75     | -474.9660 | 0.0167 | 0.7653 | 0.7501 | C <sub>∞v</sub> | -                | -474.9684 | -474.9445 | 0.67 (S1); 0.45 (C4)                         |
| <b>3c</b>                    | 548.94     | -225.6048 | 0.0584 | 0.7561 | 0.7500 | C <sub>5</sub>  | <sup>2</sup> A'  | -225.5732 | -225.5418 | 0.88 (C4)                                    |
| <b>TS<sub>3c-33</sub></b>    | 634.03(i)  | -225.5276 | 0.0526 | 0.7693 | 0.7502 | C <sub>1</sub>  | <sup>2</sup> A   | -225.5024 | -225.4698 | 0.35 (C4); 0.25 (N1)<br>0.27 (N3)            |
| <b>33</b>                    | 120.20     | -225.5756 | 0.0527 | 0.7784 | 0.7505 | C <sub>5</sub>  | <sup>2</sup> A'' | -225.5517 | -225.5165 | 0.51 (C5); 0.30 (N1)<br>0.45 (N3)            |
| <b>TS<sub>33-34</sub></b>    | 2152.50(i) | -225.4794 | 0.0470 | 0.7616 | 0.7501 | C <sub>1</sub>  | <sup>2</sup> A   | -225.4612 | -225.4261 | 0.44 (C2); 0.22 (N1)<br>0.29 (N3)            |
| <b>34</b>                    | 128.08     | -225.5581 | 0.0531 | 0.7534 | 0.7500 | C <sub>5</sub>  | <sup>2</sup> A'  | -225.5336 | -225.4983 | 0.73 (C2); 0.20 (N1)                         |
| <b>TS<sub>34-26,35</sub></b> | 513.79(i)  | -225.5162 | 0.0488 | 0.7698 | 0.7503 | C <sub>1</sub>  | <sup>2</sup> A   | -225.4973 | -225.4606 | 0.23 (C2); 0.37 (C5)<br>0.44 (N3)            |
| <b>35</b>                    | 470.81     | -93.4386  | 0.0156 | -      | -      | C <sub>∞v</sub> | <sup>1</sup> Σ   | -93.4425  | -93.4192  | -                                            |
| <b>1d</b>                    | 540.16     | -245.4579 | 0.0455 | 0.7594 | 0.7500 | C <sub>5</sub>  | <sup>2</sup> A'  | -245.4392 | -245.4079 | 0.93 (C5)                                    |
| <b>TS<sub>1d-36</sub></b>    | 466.90(i)  | -245.3861 | 0.0409 | 0.8002 | 0.7506 | C <sub>1</sub>  | <sup>2</sup> A   | -245.3725 | -245.3402 | 0.42 (C5); 0.76 (N3)                         |
| <b>36</b>                    | 160.52     | -245.4103 | 0.0409 | 0.7577 | 0.7500 | C <sub>1</sub>  | <sup>2</sup> A   | -245.3979 | -245.3634 | 0.96 (N3)                                    |

|                             |            |           |        |        |        |                |                 |           |           |                                   |
|-----------------------------|------------|-----------|--------|--------|--------|----------------|-----------------|-----------|-----------|-----------------------------------|
| <b>TS<sub>1d-37</sub></b>   | 383.14(i)  | -245.4266 | 0.0409 | 0.7598 | 0.7500 | C <sub>1</sub> | <sup>2</sup> A  | -245.4129 | -245.3806 | 0.68 (C5); 0.29 (C2)              |
| <b>37</b>                   | 148.47     | -245.4553 | 0.0410 | 0.7548 | 0.7500 | C <sub>1</sub> | <sup>2</sup> A  | -245.4429 | -245.4082 | 0.71 (C2); 0.18 (N3)              |
| <b>TS<sub>1d-21</sub></b>   | 340.38(i)  | -245.3808 | 0.0376 | 0.7674 | 0.7502 | C <sub>1</sub> | <sup>2</sup> A  | -245.3714 | -245.3375 | 0.51 (C5); 0.45 (N3)<br>0.15 (O1) |
| <b>TS<sub>36-7,38</sub></b> | 862.91(i)  | -245.3966 | 0.0374 | 0.7722 | 0.7503 | C <sub>1</sub> | <sup>2</sup> A  | -245.3885 | -245.3528 | 0.25 (C4); 0.64 (N3)<br>0.27 (O1) |
| <b>TS<sub>37-7,38</sub></b> | 460.97(i)  | -245.4306 | 0.0374 | 0.7595 | 0.7500 | C <sub>1</sub> | <sup>2</sup> A  | -245.4229 | -245.3864 | 0.39 (C4); 0.29 (C2)              |
| <b>38</b>                   | 482.88     | -151.9864 | 0.0188 | 0.7577 | 0.7500 | C <sub>5</sub> | <sup>2</sup> A' | -151.9912 | -151.9633 | 0.70 (C4); 0.29 (O1)              |
| <b>2d</b>                   | 418.32     | -568.4463 | 0.0425 | 0.7592 | 0.7500 | C <sub>5</sub> | <sup>2</sup> A' | -568.4316 | -568.3990 | 0.93 (C5)                         |
| <b>TS<sub>2d-39</sub></b>   | 458.94(i)  | -568.3849 | 0.0379 | 0.7820 | 0.7504 | C <sub>1</sub> | <sup>2</sup> A  | -568.3752 | -568.3415 | 0.35 (C5); 0.75 (N3)              |
| <b>39</b>                   | 126.60     | -568.4092 | 0.0372 | 0.7605 | 0.7501 | C <sub>1</sub> | <sup>2</sup> A  | -568.4019 | -568.3652 | 0.14 (S1); 0.90 (N3)              |
| <b>TS<sub>2d-30</sub></b>   | 156.97(i)  | -568.4068 | 0.0379 | 0.7664 | 0.7501 | C <sub>1</sub> | <sup>2</sup> A  | -568.3973 | -568.3632 | 0.55 (C5); 0.37 (C2)              |
| <b>TS<sub>2d-27</sub></b>   | 390.04(i)  | -568.3478 | 0.0353 | 0.7899 | 0.7506 | C <sub>1</sub> | <sup>2</sup> A  | -568.3416 | -568.3066 | 0.33 (C5); 0.55 (S1)<br>0.36 (N3) |
| <b>TS<sub>39-7,32</sub></b> | 455.96(i)  | -568.4024 | 0.0352 | 0.7765 | 0.7504 | C <sub>1</sub> | <sup>2</sup> A  | -568.3979 | -568.3602 | 0.19 (C4); 0.47 (S1)<br>0.57 (N3) |
| <b>3d</b>                   | 456.98     | -225.5996 | 0.0582 | 0.7511 | 0.7500 | C <sub>5</sub> | <sup>2</sup> A' | -225.5683 | -225.5367 | 0.91 (C5)                         |
| <b>TS<sub>3d-40</sub></b>   | 451.13 (i) | -225.5312 | 0.0534 | 0.7921 | 0.7506 | C <sub>5</sub> | <sup>2</sup> A' | -225.5055 | -225.4724 | 0.38 (C5); 0.80 (N3)              |
| <b>40</b>                   | 156.51     | -225.5587 | 0.0533 | 0.7583 | 0.7500 | C <sub>5</sub> | <sup>2</sup> A' | -225.5343 | -225.4989 | 0.98 (N3)                         |
| <b>TS<sub>40-26,7</sub></b> | 645.24(i)  | -225.5344 | 0.0495 | 0.7774 | 0.7505 | C <sub>1</sub> | <sup>2</sup> A  | -225.5141 | -225.4783 | 0.37 (C4); 0.42 (N1)<br>0.47 (N3) |
| <b>TS<sub>3d-41</sub></b>   | 373.81 (i) | -225.5327 | 0.0517 | 0.7694 | 0.7501 | C <sub>1</sub> | <sup>2</sup> A  | -225.5084 | -225.4756 | 0.47 (C2); 0.49 (C5)              |
| <b>41</b>                   | 126.80     | -225.5642 | 0.0527 | 0.7545 | 0.7500 | C <sub>1</sub> | <sup>2</sup> A  | -225.5404 | -225.5052 | 0.69 (C2); 0.19 (N3)              |
| <b>TS<sub>41-26,7</sub></b> | 560.22 (i) | -225.5350 | 0.0488 | 0.7667 | 0.7502 | C <sub>1</sub> | <sup>2</sup> A  | -225.5159 | -225.4794 | 0.36 (C2); 0.44 (C4)<br>0.24 (N1) |



**Table 8S.** Properties of reactants, intermediates, products and transition states of unimolecular decomposition pathways of dehydro-oxazole, thiazole and imidazole radicals at (U)M06-2X/cc-pVTZ level of theory

| Species                        | Lowest Harmonic frequency | Absolute energy (Hartrees) | ZVPE (Hartrees) | <S <sup>2</sup> > (annihilated) |        | Point Group     | Electronic structure        | $\Delta G$ (Hartrees) | $\Delta H$ (Hartrees) | Spin density                   |
|--------------------------------|---------------------------|----------------------------|-----------------|---------------------------------|--------|-----------------|-----------------------------|-----------------------|-----------------------|--------------------------------|
|                                |                           |                            |                 | Before                          | After  |                 |                             |                       |                       |                                |
| <b>3a</b>                      | 530.09                    | -225.5436                  | 0.0575          | 0.7645                          | 0.7501 | C <sub>2v</sub> | <sup>2</sup> B <sub>1</sub> | -225.5122             | -225.4815             | 0.51 (C2); 0.35 (C4=C5)        |
| <b>TS<sub>3a-5</sub></b>       | 431.30(i)                 | -225.4325                  | 0.0526          | 0.7853                          | 0.7506 | C <sub>1</sub>  | <sup>2</sup> A              | -225.4072             | -225.3748             | 0.99 (N1)                      |
| <b>5</b>                       | 147.74                    | -225.4466                  | 0.0527          | 0.7834                          | 0.7504 | C <sub>1</sub>  | <sup>2</sup> A              | -225.4224             | -225.3878             | 1.07 (N1)                      |
| <b>TS<sub>5-6,7</sub></b>      | 520.16(i)                 | -225.3956                  | 0.0482          | 0.7954                          | 0.7510 | C <sub>1</sub>  | <sup>2</sup> A              | -225.3769             | -225.3406             | 0.59 (C2); 0.32 (C4) 0.31 (N1) |
| <b>6</b>                       | 402.52(i)                 | -131.9796                  | 0.2775          | 0.7782                          | 0.7501 | C <sub>1</sub>  | <sup>2</sup> A              | -131.9757             | -225.9474             | 0.58 (C2=C4)                   |
| <b>7</b>                       |                           |                            |                 |                                 |        | C <sub>∞v</sub> | <sup>1</sup> Σ              |                       |                       | -                              |
| <b>1b</b>                      | 619.20                    | -245.37124                 | 0.0464          | 0.7607                          | 0.7501 | C <sub>s</sub>  | <sup>2</sup> A'             | -245.3515             | -245.3204             | 0.95 (C2)                      |
| <b>TS<sub>1b-8</sub></b>       | 651.69(i)                 | -245.3003                  | 0.0414          | 0.7930                          | 0.7509 | C <sub>1</sub>  | <sup>2</sup> A              | -245.2860             | -245.2539             | 0.83 (C4); 0.43 (C2)           |
| <b>TS<sub>1b-9</sub></b>       | 778.28(i)                 | -245.3115                  | 0.0412          | 0.7832                          | 0.7504 | C <sub>1</sub>  | <sup>2</sup> A              | -245.2975             | -245.2655             | 0.68 (C5); 0.51 (C2)           |
| <b>8</b>                       | 165.33                    | -245.3312                  | 0.0419          | 0.7654                          | 0.7501 | C <sub>s</sub>  | <sup>2</sup> A'             | -245.3177             | -245.2834             | 1.07(C4)                       |
| <b>9</b>                       | 104.49                    | -245.3761                  | 0.0425          | 0.7685                          | 0.7501 | C <sub>s</sub>  | <sup>2</sup> A'             | -245.3624             | -245.3276             | 1.08 (C5)                      |
| <b>TS<sub>8-10,11</sub></b>    | 643.43(i)                 | -245.2993                  | 0.0379          | 0.7765                          | 0.7505 | C <sub>1</sub>  | <sup>2</sup> A              | -245.2898             | -245.2558             | 0.59 (C4); 0.24 (N3) (O1)      |
| <b>TS<sub>9-10,11</sub></b>    | 402.12(i)                 | -245.3238                  | 0.0387          | 0.7676                          | 0.7502 | C <sub>1</sub>  | <sup>2</sup> A              | -245.3152             | -245.2786             | 0.43 (C5); 0.53 (N3) 0.19(O1)  |
| <b>10</b>                      | 542.59                    | -167.9994                  | 0.0104          | 0.7664                          | 0.7501 | C <sub>∞v</sub> | -                           | -168.0109             | -167.9853             | 0.34 (O1); 0.74 (N3)           |
| <b>11</b>                      | 711.31                    | -77.3245                   | 0.0275          | 0.0000                          | 0.0000 | D <sub>∞h</sub> | <sup>1</sup> Σ <sub>g</sub> | -77.3159              | -77.2933              | -                              |
| <b>2b</b>                      | 457.37                    | -568.3579                  | 0.0430          | 0.7591                          | 0.7500 | C <sub>s</sub>  | <sup>2</sup> A'             | -568.3427             | -568.3101             | 0.83 (C2)                      |
| <b>TS<sub>2b-12</sub></b>      | 553.33(i)                 | -568.2931                  | 0.0384          | 0.7806                          | 0.7506 | C <sub>1</sub>  | <sup>2</sup> A              | -568.2830             | -568.2494             | 0.83(C4); 0.35(C2)             |
| <b>TS<sub>2b-13</sub></b>      | 508.13(i)                 | -568.2888                  | 0.0393          | 0.8033                          | 0.7510 | C <sub>1</sub>  | <sup>2</sup> A              | -568.2776             | -568.2443             | 0.82 (C5); 0.38 (C2)           |
| <b>TS<sub>2b-15</sub></b>      | 357.27(i)                 | -568.3275                  | 0.0406          | 0.7602                          | 0.7501 | C <sub>1</sub>  | <sup>2</sup> A              | -568.3152             | -568.2817             | 0.81 (S1); 0.06(C2) 0.13 (N3)  |
| <b>12</b>                      | 144.24                    | -568.3178                  | 0.0385          | 0.7680                          | 0.7501 | C <sub>1</sub>  | <sup>2</sup> A              | -568.3089             | -568.2728             | 1.08 (C4)                      |
| <b>13</b>                      | 57.08                     | -568.3311                  | 0.0397          | 0.7720                          | 0.7501 | C <sub>1</sub>  | <sup>2</sup> A              | -568.3215             | -568.2849             | 1.09 (C5)                      |
| <b>15</b>                      | 117.33                    | -568.3428                  | 0.0415          | 0.7542                          | 0.7500 | C <sub>1</sub>  | <sup>2</sup> A              | -568.3307             | -568.2953             | 0.99 (S1)                      |
| <b>15a</b>                     | 110.71                    | -568.3226                  | 0.0412          | 0.7567                          | 0.7500 | C <sub>1</sub>  | <sup>2</sup> A              | -568.3114             | -568.2751             | 0.61(C5); 0.34(S1)             |
| <b>15b</b>                     | 303.60                    | -132.0482                  | 0.0307          | 0.7624                          | 0.7501 | C <sub>1</sub>  | <sup>2</sup> A              | -132.0418             | -132.0127             | 0.92 (C4); 0.31(C5)            |
| <b>TS<sub>12-14,11</sub></b>   | 362.31(i)                 | -568.3036                  | 0.0364          | 0.7724                          | 0.7503 | C <sub>1</sub>  | <sup>2</sup> A              | -568.2977             | -568.2604             | 0.55 (C4); 0.59 (S1) 0.10 (N3) |
| <b>TS<sub>13-14,11</sub></b>   | 586.95(i)                 | -568.2869                  | 0.0364          | 0.7812                          | 0.7506 | C <sub>1</sub>  | <sup>2</sup> A              | -568.2815             | -568.2438             | 0.54 (C5); 0.38 (S1) 0.31(N3)  |
| <b>TS<sub>15-16</sub></b>      | Channel not found         |                            |                 |                                 |        | C <sub>1</sub>  | <sup>2</sup> A              |                       |                       | (C5); (S1)                     |
| <b>16</b>                      | 106.69                    | -568.3051                  | 0.0381          | 0.7620                          | 0.7501 | C <sub>1</sub>  | <sup>2</sup> A              | -568.2969             | -568.2605             | 0.85(C5); 0.17 (S1)            |
| <b>TS<sub>16-17</sub></b>      | Channel not found         |                            |                 |                                 |        | C <sub>1</sub>  | <sup>2</sup> A              |                       |                       | (H)                            |
| <b>TS<sub>15-17</sub></b>      | 842.20 (i)                | -568.24049                 | 0.0311          | 0.7662                          | 0.7500 | C <sub>1</sub>  | <sup>2</sup> A              | -568.2397             | -568.2025             | 0.23 (S1); 0.89 (H)            |
| <b>TS<sub>15-15a</sub></b>     | 1395.10(i)                | -568.2686                  | 0.0364          | 0.7543                          | 0.7500 | C <sub>1</sub>  | <sup>2</sup> A              | -568.2618             | -568.2261             | 0.32(C5); 0.57(S1)             |
| <b>TS<sub>15a-15b,31</sub></b> | 294.77(i)                 | -568.2613                  | 0.0359          | 0.7714                          | 0.7503 | C <sub>1</sub>  | <sup>2</sup> A              | -568.2569             | -568.2182             | 0.78(C4); 0.12(S1); 0.27 (C1)  |
| <b>14</b>                      | 349.63                    | -490.9820                  | 0.0081          | 0.7654                          | 0.7501 | C <sub>∞v</sub> | <sup>2</sup> A              | -490.9972             | -490.9698             | 0.33 (N3); 0.83 (S1)           |
| <b>17</b>                      | 128.50                    | -567.74793                 | 0.0297          | 0.0000                          | 0.0000 | C <sub>s</sub>  | <sup>1</sup> A'             | -567.7468             | -567.7123             | -                              |
| <b>3b</b>                      | 495.90                    | -225.5159                  | 0.05919         | 0.7593                          | 0.7500 | C <sub>s</sub>  | <sup>2</sup> A'             | -225.4835             | -225.4521             | 0.93(C2)                       |
| <b>TS<sub>3b-19</sub></b>      | 740.70 (i)                | -225.4248                  | 0.0527          | 0.7892                          | 0.7506 | C <sub>1</sub>  | <sup>2</sup> A              | -225.3994             | -225.3669             | 0.79 (C5); 0.42 (C2)           |
| <b>19</b>                      | 194.91                    | -225.4663                  | 0.0521          | 0.7697                          | 0.7501 | C <sub>1</sub>  | <sup>2</sup> A              | -225.4434             | -225.4079             | 1.08 (C5)                      |
| <b>TS<sub>19-20,11</sub></b>   | 578.93 (i)                | -225.4294                  | 0.0495          | 0.7787                          | 0.7506 | C <sub>1</sub>  | <sup>2</sup> A              | -225.4099             | -225.3732             | 0.54 (C5); 0.31 (N1) 0.48 (N3) |

|                              |             |            |          |        |        |                  |                  |           |           |                                                |
|------------------------------|-------------|------------|----------|--------|--------|------------------|------------------|-----------|-----------|------------------------------------------------|
| <b>20</b>                    | 475.61      | -147.1199  | 0.0194   | 0.7770 | 0.7502 | C <sub>5</sub>   | <sup>2</sup> A'' | -148.1242 | -148.0962 | 0.68 (N1); 0.59(N3)                            |
| <b>TS<sub>3b-18</sub></b>    | 621.69 (i)  | -225.4433  | 0.0539   | 0.7907 | 0.7508 | C <sub>1</sub>   | <sup>2</sup> A   | -225.4169 | -225.3841 | 0.41 (C2); 0.85 (C4)                           |
| <b>18</b>                    | 90.37       | -225.4782  | 0.0538   | 0.7664 | 0.7501 | C <sub>5</sub>   | <sup>2</sup> A'' | -225.4528 | -225.4185 | 1.08 (C4)                                      |
| <b>TS<sub>18-20,11</sub></b> | 584.66 (i)  | -225.4314  | 0.0501   | 0.7770 | 0.7505 | C <sub>1</sub>   | <sup>2</sup> A   | -225.4112 | -225.3747 | 0.54 (C4); 0.56(N1)<br>0.26 (N3)               |
| <b>1c</b>                    | 620.83      | -245.37171 | 0.0467   | 0.7604 | 0.7500 | C <sub>5</sub>   | <sup>2</sup> A'  | -245.3517 | -245.3206 | 0.9958 (C4)                                    |
| <b>TS<sub>1c-21</sub></b>    | 319.12(i)   | -245.3009  | 0.0414   | 0.7656 | 0.7501 | C <sub>1</sub>   | <sup>2</sup> A   | -245.2868 | -245.2545 | 0.42 (C4); 0.49(O1)<br>0.07 (C5)               |
| <b>21</b>                    | 94.70       | -245.3566  | 0.0412   | 0.7735 | 0.7503 | C <sub>1</sub>   | <sup>2</sup> A   | -245.3443 | -245.3092 | 0.71 (C5); 0.45 (N3)                           |
| <b>TS<sub>1c-23</sub></b>    | 396.96(i)   | -245.2835  | 0.0401   | 0.7627 | 0.7501 | C <sub>1</sub>   | <sup>2</sup> A   | -245.2711 | -245.2379 | 0.90 (C4); 0.12(C2)                            |
| <b>23</b>                    | 67.76       | -245.3062  | 0.0397   | 0.7778 | 0.7504 | C <sub>1</sub>   | <sup>2</sup> A   | -245.2955 | -245.2601 | 0.79 (C4); 0.36 (C2)                           |
| <b>TS<sub>21-22</sub></b>    | 1884.24(i)  | -245.2714  | 0.0364   | 0.7587 | 0.7500 | C <sub>1</sub>   | <sup>2</sup> A   | -245.2635 | -245.2291 | 0.41(C2); 0.24(N3)<br>0.19 (O1)                |
| <b>22</b>                    | 158.32      | -245.3573  | 0.043261 | 0.7541 | 0.7500 | C <sub>1</sub>   | <sup>2</sup> A   | -245.3425 | -245.3080 | 0.68 (C2); 0.27 (O1)                           |
| <b>TS<sub>23-24</sub></b>    | 1041.73(i)  | -245.2719  | 0.0366   | 0.7632 | 0.7501 | C <sub>1</sub>   | <sup>2</sup> A   | -245.2636 | -245.2295 | 0.73 (C2)                                      |
| <b>24</b>                    | 188.51      | -245.3353  | 0.0412   | 0.7581 | 0.7500 | C <sub>1</sub>   | <sup>2</sup> A   | -245.3222 | -245.2880 | 0.67 (C5); 0.28 (O1)                           |
| <b>TS<sub>22-25,26</sub></b> | 611.74(i)   | -245.3282  | 0.0392   | 0.7695 | 0.7503 | C <sub>1</sub>   | <sup>2</sup> A   | -245.3180 | -245.2827 | 0.37 (C5); 0.27(C2)<br>0.47 (N3)               |
| <b>TS<sub>24-25,6</sub></b>  | 337.87      | -245.2945  | 0.0355   | 0.7807 | 0.7507 | C <sub>1</sub>   | <sup>2</sup> A   | -245.2894 | -245.2518 | 0.68 (C4); 0.29 (C2)<br>0.11 (C5)              |
| <b>25</b>                    | 2263.37     | -113.3188  | 0.0052   | 0.0000 | 0.0000 | C <sub>ooV</sub> | <sup>1</sup> Σ   | -113.3328 | -113.3104 | -                                              |
| <b>26</b>                    | 421.43      | 132.0326   | 0.0298   | 0.7744 | 0.7502 | C <sub>1</sub>   | <sup>2</sup> A   | -132.0268 | -131.9980 | 0.76 (C5); 0.55 (N3)                           |
| <b>2c</b>                    | 479.06      | -568.3543  | 0.0429   | 0.7609 | 0.7501 | C <sub>5</sub>   | <sup>2</sup> A'  | -568.3389 | -568.3065 | 0.95(C4)                                       |
| <b>TS<sub>2c-27</sub></b>    | 348.73(i)   | -568.3067  | 0.0403   | 0.7661 | 0.7501 | C <sub>1</sub>   | <sup>2</sup> A   | -568.2945 | -568.2614 | 0.36 (C4);0.72 (S1)                            |
| <b>27</b>                    | 110.47      | -568.3177  | 0.0406   | 0.7546 | 0.7500 | C <sub>1</sub>   | <sup>2</sup> A   | -568.3065 | -568.2711 | 0.99 (S1)                                      |
| <b>TS<sub>2c-29</sub></b>    | 318.10(i)   | -568.2604  | 0.0373   | 0.7730 | 0.7503 | C <sub>1</sub>   | <sup>2</sup> A   | -568.2523 | -568.2173 | 0.82 (C4); 0.21 (C2)                           |
| <b>29</b>                    | 66.97       | -568.2648  | 0.0390   | 0.7545 | 0.7500 | C <sub>1</sub>   | <sup>2</sup> A   | -568.2557 | -568.2194 | 0.99 (S1)                                      |
| <b>TS<sub>27-28</sub></b>    | 1861.22(i)  | -568.2302  | 0.0344   | 0.7582 | 0.7500 | C <sub>1</sub>   | <sup>2</sup> A   | -568.2254 | -568.1896 | 0.35 (S1); 0.34 (C2)<br>0.17 (N3)              |
| <b>28</b>                    | 121.51      | -568.3118  | 0.0413   | 0.7560 | 0.7500 | C <sub>1</sub>   | <sup>2</sup> A   | -568.2999 | -568.2644 | 0.41 (S1); 0.58 (C2)                           |
| <b>TS<sub>29-30</sub></b>    | 715.01 (i)  | -568.23747 | 0.0338   | 0.7672 | 0.7502 | C <sub>1</sub>   | <sup>2</sup> A   | -568.2334 | -568.1969 | 0.77 (C2)                                      |
| <b>30</b>                    | 77.79       | -568.2971  | 0.0386   | 0.7567 | 0.7500 | C <sub>1</sub>   | <sup>2</sup> A   | -568.2888 | -568.2519 | 0.56 (C5); 0.38 (S1)                           |
| <b>TS<sub>28-26,31</sub></b> | 449.51(i)   | -568.2355  | 0.0354   | 0.7807 | 0.7506 | C <sub>1</sub>   | <sup>2</sup> A   | -568.2310 | -568.1932 | 0.54(C5); 0.12 (S1)<br>0.53 (N3)<br>(C2); (N3) |
| <b>TS<sub>30-7,32</sub></b>  | 443.19(i)   | -568.2884  | 0.0366   | 0.7607 | 0.7501 | C <sub>1</sub>   | <sup>2</sup> A   | -568.2819 | -568.2453 | 0.19(C4); 0.15(C5)<br>0.34 (S1); 0.29(C2)      |
| <b>31</b>                    | 1332.74     | -436.2102  | 0.0030   | 0.0000 | 0.0000 | C <sub>ooV</sub> | <sup>1</sup> Σ   | -436.2277 | -436.2039 | -                                              |
| <b>32</b>                    | 389.98      | -474.8932  | 0.0171   | 0.7700 | 0.7501 | C <sub>ooV</sub> | -                | -474.8948 | -474.8714 | 0.69 (S1); 0.52 (C4)                           |
| <b>3c</b>                    | 566.21      | -225.5157  | 0.0594   | 0.7593 | 0.7500 | C <sub>5</sub>   | <sup>2</sup> A'  | -225.4830 | -225.4517 | 0.98 (C4)                                      |
| <b>TS<sub>3c-33</sub></b>    | 821.89 (i)  | -225.4240  | 0.0574   | 0.7623 | 0.7501 | C <sub>1</sub>   | <sup>2</sup> A   | -225.3981 | -225.3656 | 0.32 (C4); 0.27 (N1)<br>0.26 (N3)              |
| <b>33</b>                    | 100.55      | -225.4735  | 0.0535   | 0.7815 | 0.7506 | C <sub>5</sub>   | <sup>2</sup> A'' | -225.4489 | -225.4137 | 0.64(C5); 0.27 (N1)<br>0.48 (N3)               |
| <b>TS<sub>33-34</sub></b>    | 2067.16 (i) | -225.3802  | 0.0481   | 0.7621 | 0.7501 | C <sub>1</sub>   | <sup>2</sup> A   | -225.3608 | -225.3258 | 0.46 (C2); 0.23 (C5)<br>0.31 (N3)              |
| <b>34</b>                    | 123.89      | -225.4608  | 0.0540   | 0.7543 | 0.7500 | C <sub>5</sub>   | <sup>2</sup> A'  | -225.4354 | -225.4003 | 0.78 (C2); 0.16 (N1)                           |
| <b>TS<sub>34-26,35</sub></b> | 563.52 (i)  | -225.4137  | 0.0494   | 0.7699 | 0.7503 | C <sub>1</sub>   | <sup>2</sup> A   | -225.3938 | -225.3574 | 0.22 (C2); 0.39 (C5)<br>0.50 (N3)              |
| <b>35</b>                    | 419.07      | -132.0326  | 0.0298   | 0.7744 | 0.7502 | C <sub>ooV</sub> | <sup>1</sup> Σ   | -132.0267 | -131.9979 | 0.76 (C4); 0.55 (N1)                           |

|                             |            |           |         |        |        |                |                 |           |           |                                   |
|-----------------------------|------------|-----------|---------|--------|--------|----------------|-----------------|-----------|-----------|-----------------------------------|
| <b>1d</b>                   | 588.46     | -245.3676 | 0.0466  | 0.7628 | 0.7501 | C <sub>5</sub> | <sup>2</sup> A' | -245.3477 | -245.3166 | 1.0229 (C5)                       |
| <b>TS<sub>1d-36</sub></b>   | 660.69(i)  | -245.2839 | 0.0416  | 0.8039 | 0.7511 | C <sub>1</sub> | <sup>2</sup> A  | -245.2695 | -245.2374 | 0.48(C5);0.80(N3)                 |
| <b>36</b>                   | 170.56     | -245.3138 | 0.0419  | 0.7608 | 0.7501 | C <sub>1</sub> | <sup>2</sup> A  | -245.3001 | -245.2659 | 1.01 (N3)                         |
| <b>TS<sub>1d-37</sub></b>   | 400.08(i)  | -245.3207 | 0.0414  | 0.7627 | 0.7501 | C <sub>1</sub> | <sup>2</sup> A  | -245.3065 | -245.2744 | 0.71(C5); 0.30(C2)                |
| <b>37</b>                   | 147.67     | -245.3509 | 0.0417  | 0.7566 | 0.7500 | C <sub>1</sub> | <sup>2</sup> A  | -245.3378 | -245.3032 | 0.76(C2);0.14 (N3)                |
| <b>TS<sub>1d-21</sub></b>   | 419.31(i)  | -245.2781 | 0.0386  | 0.7710 | 0.7502 | C <sub>1</sub> | <sup>2</sup> A  | -245.2675 | -245.2339 | 0.56 (C5); 0.46 (N3)<br>0.13 (O1) |
| <b>TS<sub>36-7,38</sub></b> | 1139.33(i) | -245.2895 | 0.03801 | 0.7803 | 0.7506 | C <sub>1</sub> | <sup>2</sup> A  | -245.2804 | -245.2452 | 0.29 (C4);0.63 (N3)<br>0.33 (O1)  |
| <b>TS<sub>37-7,38</sub></b> | 490.42(i)  | -245.3236 | 0.0382  | 0.7623 | 0.7501 | C <sub>1</sub> | <sup>2</sup> A  | -245.3148 | -245.2789 | 0.38(C4); 0.34(C2)                |
| <b>38</b>                   | 404.04     | -151.9191 | 0.0190  | 0.7617 | 0.7501 | C <sub>5</sub> | <sup>2</sup> A' | -151.9235 | -151.8956 | 0.74(C4); 0.29 (O1)               |
| <b>2d</b>                   | 442.32     | -568.3466 | 0.0433  | 0.7636 | 0.7501 | C <sub>5</sub> | <sup>2</sup> A' | -568.3309 | -568.2985 | 1.02 (C5)                         |
| <b>TS<sub>2d-39</sub></b>   | 567.17(i)  | -568.2761 | 0.0386  | 0.7845 | 0.7507 | C <sub>1</sub> | <sup>2</sup> A  | -568.2657 | -568.2321 | 0.39 (C5);0.80 (N3)               |
| <b>39</b>                   | 130.54     | -568.3028 | 0.0381  | 0.7646 | 0.7501 | C <sub>1</sub> | <sup>2</sup> A  | -568.2945 | -568.2581 | 0.13 (S1);0.97 (N3)               |
| <b>TS<sub>2d-30</sub></b>   | 189.24(i)  | -568.2939 | 0.0385  | 0.7648 | 0.7501 | C <sub>1</sub> | <sup>2</sup> A  | -568.2839 | -568.2499 | 0.58 (C5); 0.32 (C2)              |
| <b>TS<sub>2d-27</sub></b>   | 447.81(i)  | -568.2382 | 0.0357  | 0.7954 | 0.7507 | C <sub>1</sub> | <sup>2</sup> A  | -568.2315 | -568.1968 | 0.34 (C5); 0.57 (S1)<br>0.40 (N3) |
| <b>TS<sub>39-7,32</sub></b> | 550.88(i)  | -568.2928 | 0.0358  | 0.7795 | 0.7505 | C <sub>1</sub> | <sup>2</sup> A  | -568.2877 | -568.2501 | 0.19 (C4); 0.49(S1)<br>0.59 (N3)  |
| <b>3d</b>                   | 502.01     | -225.5101 | 0.0593  | 0.7612 | 0.7501 | C <sub>5</sub> | <sup>2</sup> A' | -225.4776 | -225.4462 | 1.02 (C5)                         |
| <b>TS<sub>3d-40</sub></b>   | 599.45 (i) | -225.4300 | 0.0539  | 0.7961 | 0.7509 | C <sub>5</sub> | <sup>2</sup> A' | -225.4036 | -225.3706 | 0.43 (C5); 0.85 (N3)              |
| <b>40</b>                   | 157.51     | -225.4621 | 0.0540  | 0.7618 | 0.7501 | C <sub>5</sub> | <sup>2</sup> A' | -225.4370 | -225.4016 | 1.03 (N3)                         |
| <b>TS<sub>40-26,7</sub></b> | 745.96 (i) | -225.4305 | 0.0503  | 0.7819 | 0.7507 | C <sub>1</sub> | <sup>2</sup> A  | -225.4093 | -225.3738 | 0.41 (C4); 0.48 (N1)<br>0.50 (N3) |
| <b>TS<sub>3d-41</sub></b>   | 475.55 (i) | -225.4281 | 0.0523  | 0.7732 | 0.7502 | C <sub>1</sub> | <sup>2</sup> A  | -225.4032 | -225.3705 | 0.55 (C2); 0.50 (C5)              |
| <b>41</b>                   | 132.76     | -225.4624 | 0.0534  | 0.7561 | 0.7500 | C <sub>1</sub> | <sup>2</sup> A  | -225.4378 | -225.4027 | 0.75 (C2); 0.15(N3)               |
| <b>TS<sub>41-26,7</sub></b> | 625.76 (i) | -225.4305 | 0.0495  | 0.7693 | 0.7502 | C <sub>1</sub> | <sup>2</sup> A  | -225.4104 | -225.3743 | 0.41 (C2); 0.47 (C4)<br>0.24 (N1) |
